# Supplementary material for: Regio and stereoselective synthesis of β-keto functionalized C-glycosides via iron catalyzed Ferrier rearrangement reactions
Source: Royal Society of Chemistry journal article supplement (doi:10.1039/c4ra07429g), 2014-01-01

# **Regio- and Stereoselective Synthesis of $\beta$ -Keto Functionalized C-Glycosides via Iron-Catalyzed Intermolecular Decarboxylative Ferrier Rearrangement Reactions**

Hong Yee Tan, Shaohua Xiang, Wei Lin Leng and Xue-Wei Liu\*

Division of Chemistry and Biological Chemistry, School of Physical and  
Mathematical Sciences, Nanyang Technological University, Singapore  
637371

E-mail: [xuewei@ntu.edu.sg](mailto:xuewei@ntu.edu.sg)

## Supporting Information

### Table of Contents

|                                                    |      |
|----------------------------------------------------|------|
| Spectral Data for C-Glycosides (3a-3j, 4b-4e)..... | 2-23 |
| COSY Spectrum for C-Glycoside 3d.....              | 16   |
| NOESY Spectrum for C-Glycoside 3d.....             | 17   |

### Spectra Data for C-Glycosides (3a-3j):

#### 1-((4,6-di-acetyl)-2,3-dideoxy- $\alpha$ -D-erythro-hex-2-enopyranoxyl)-1-phenyl-ethanone (3a)

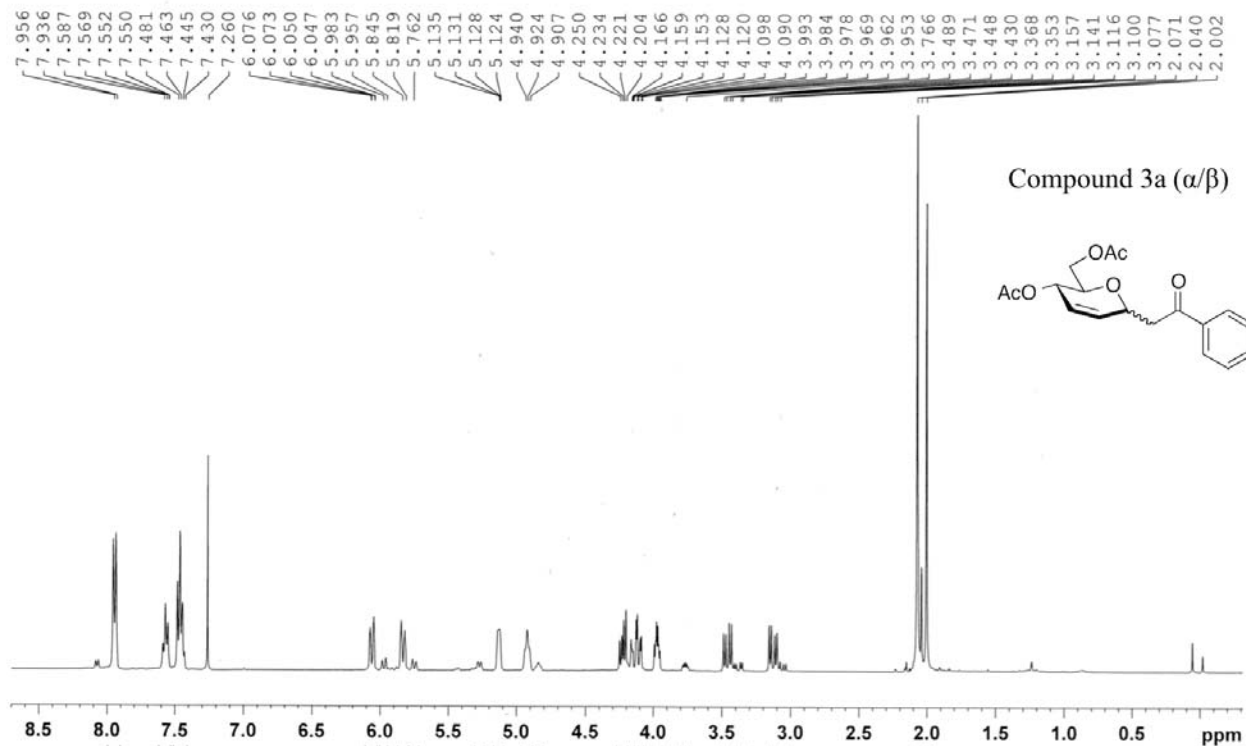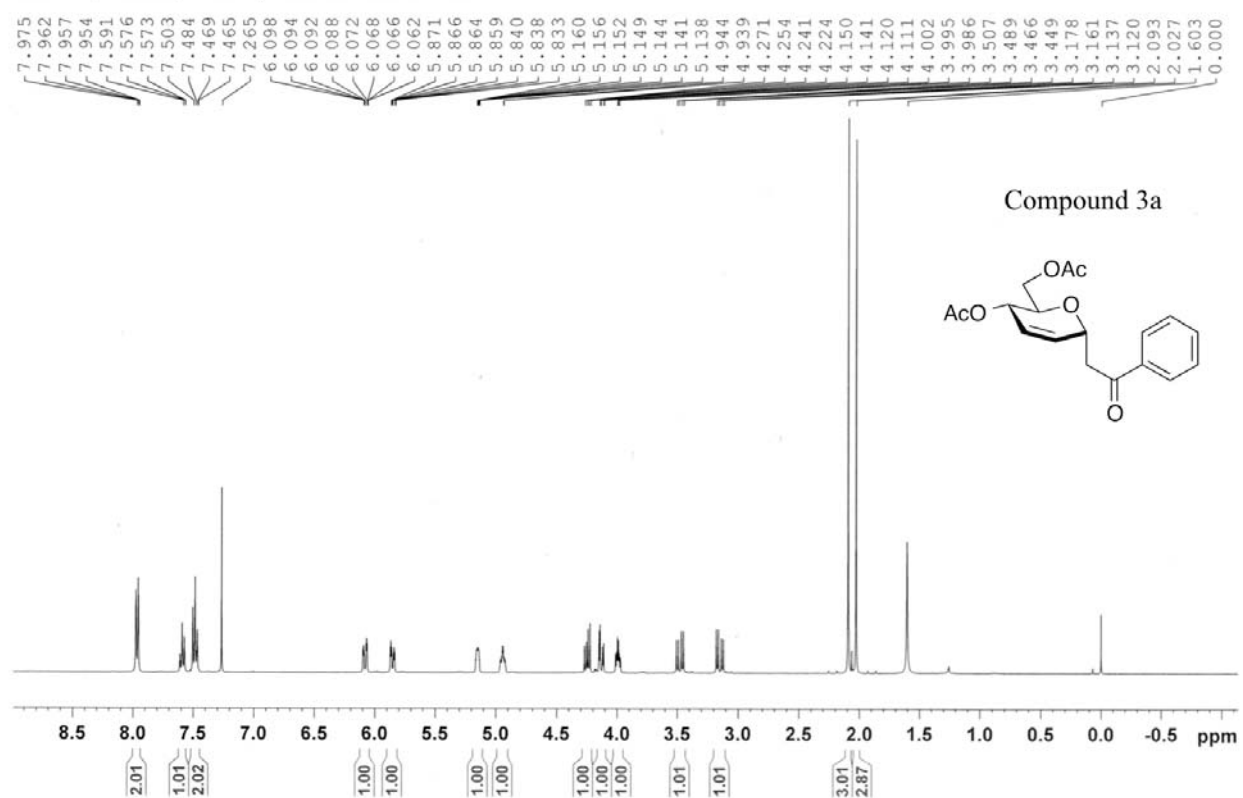

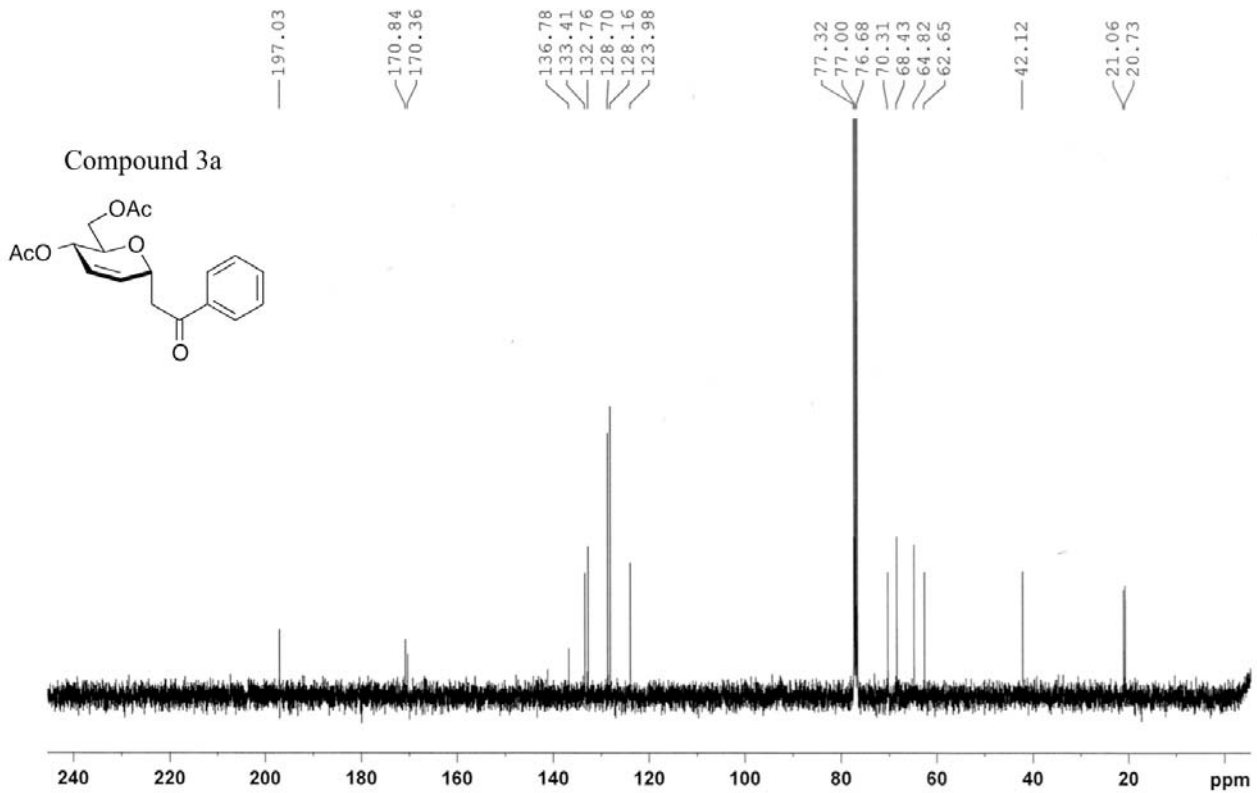

**1-((4,6-di-acetyl)-2,3-dideoxy- $\alpha$ -D-threo-hex-2-enopyranoxyl)-1-(4-methoxyphenyl)ethanone (3b)**

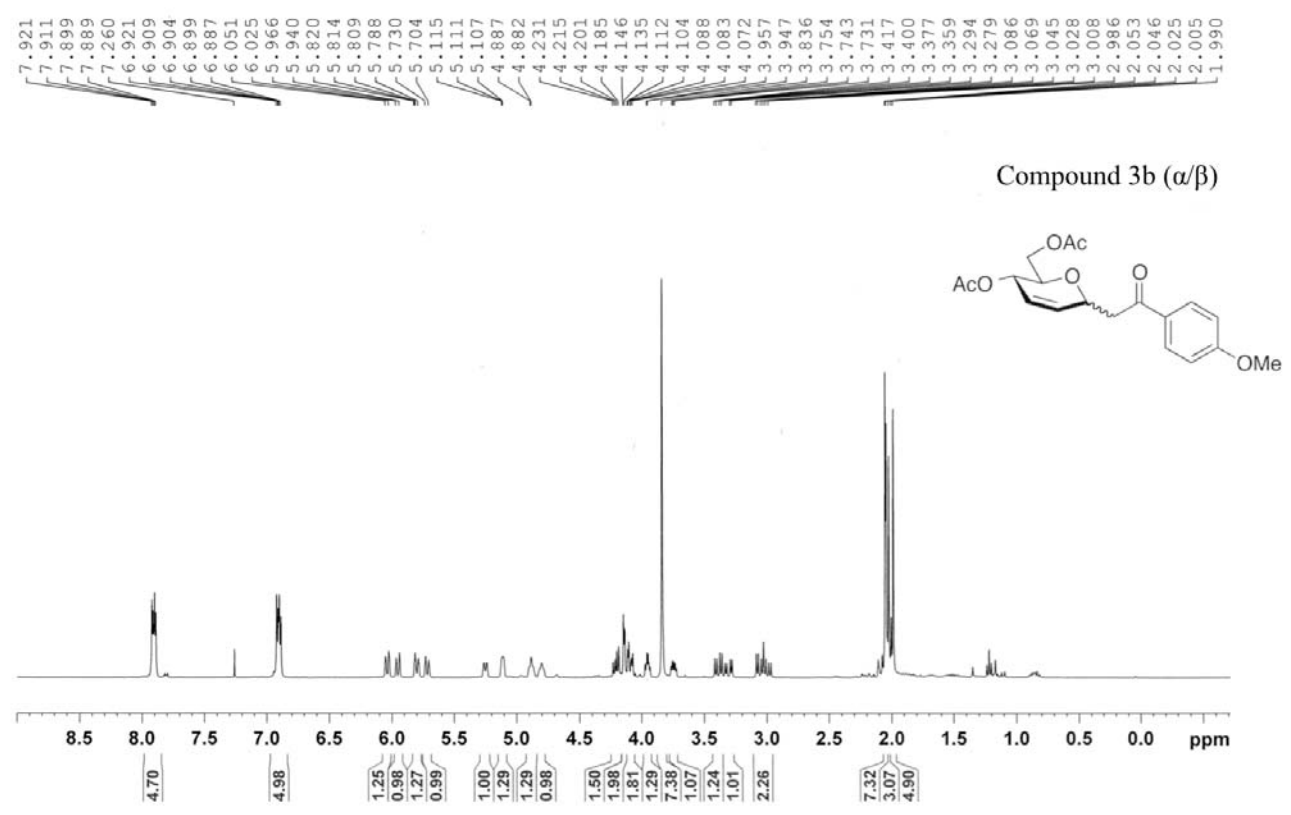

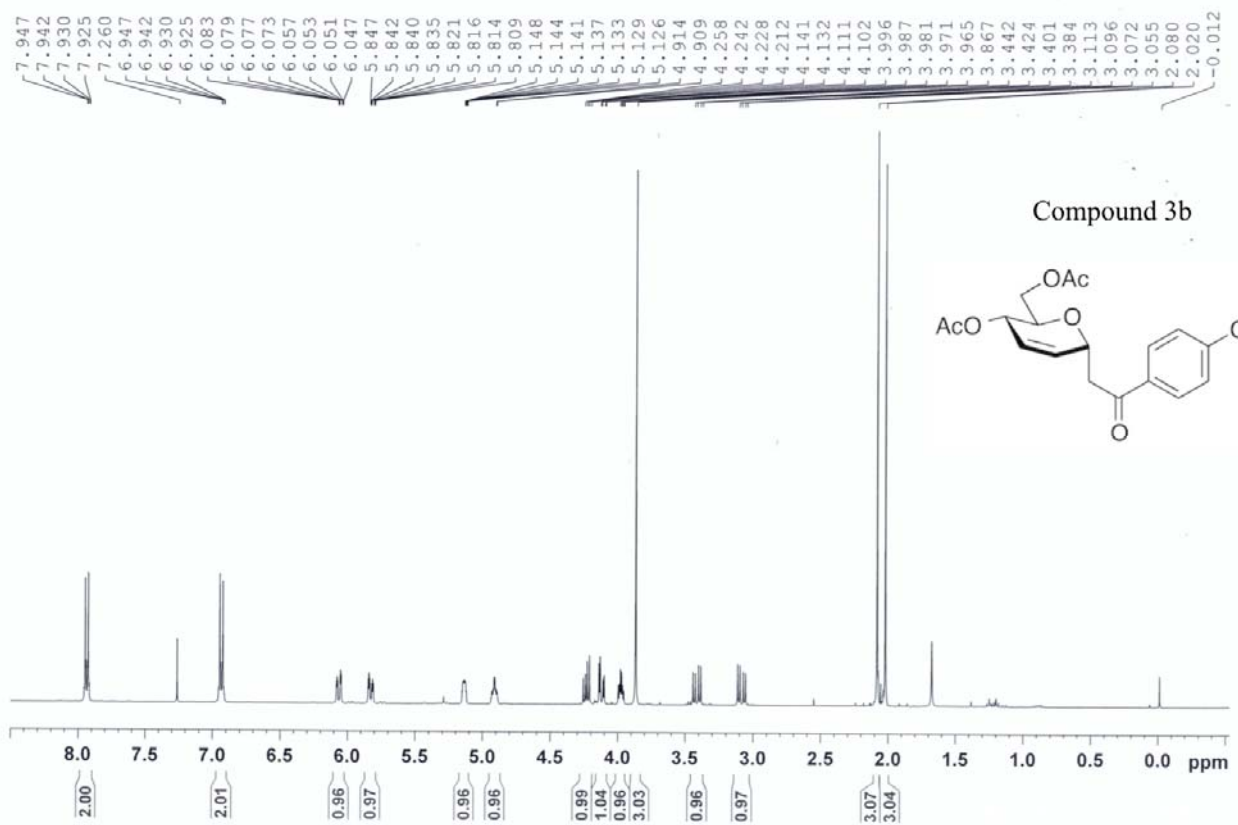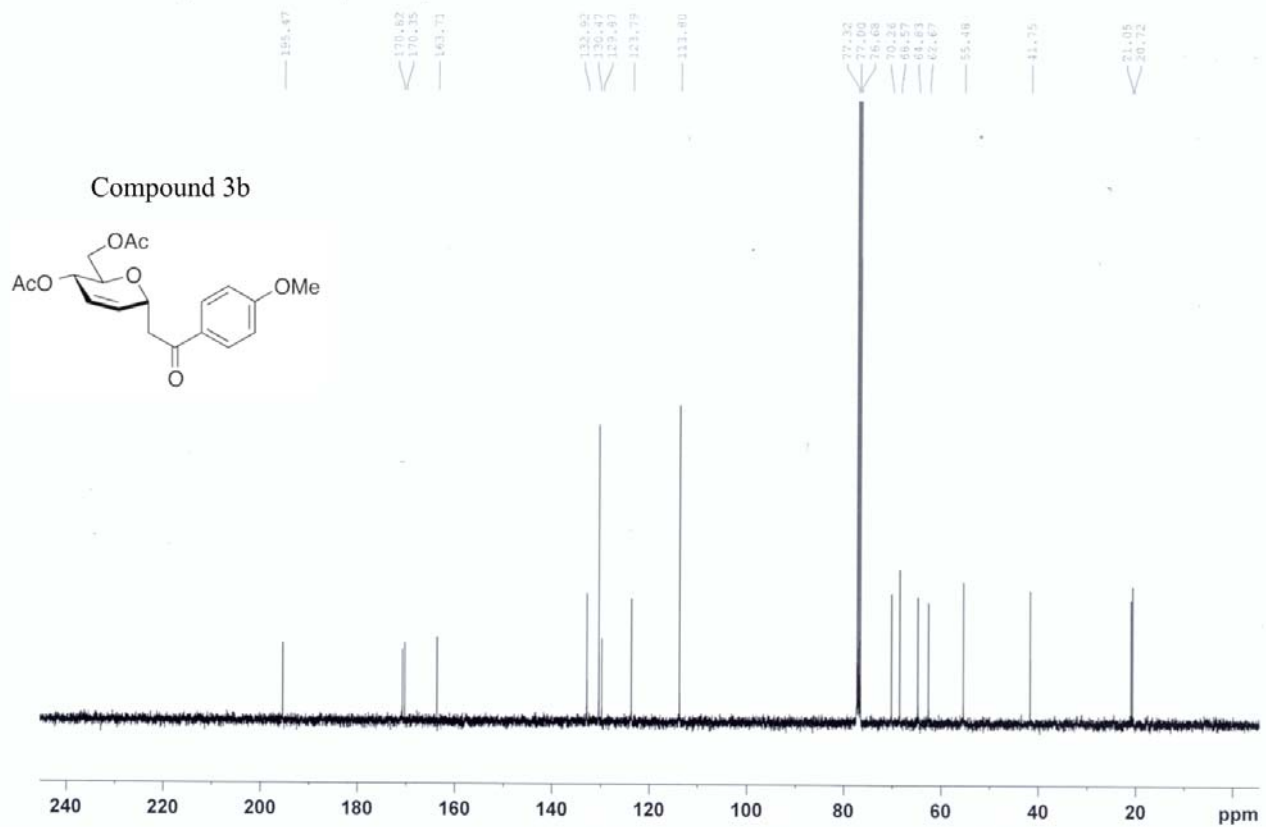

**1-((4,6-di-acetyl)-2,3-dideoxy- $\alpha$ -D-threo-hex-2-enopyranoxyl)-1-(4-chlorophenyl)ethanone (3c)**

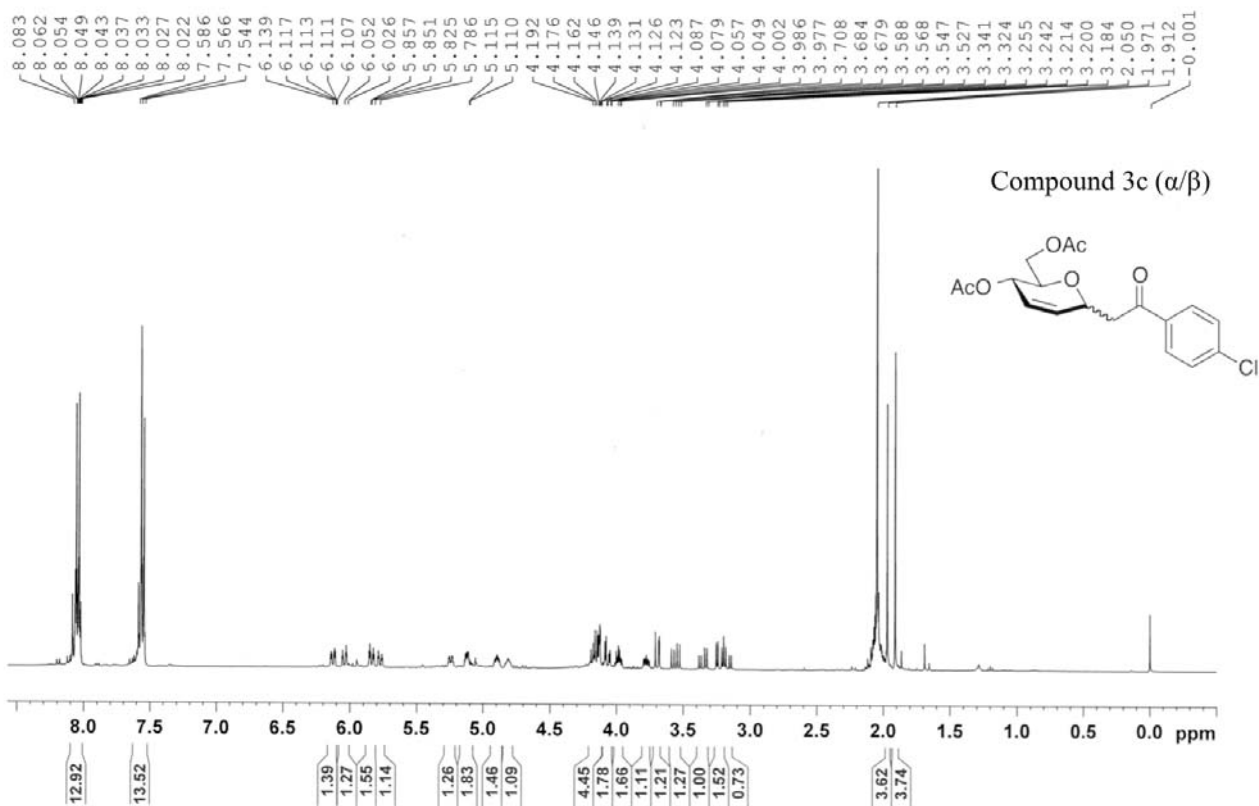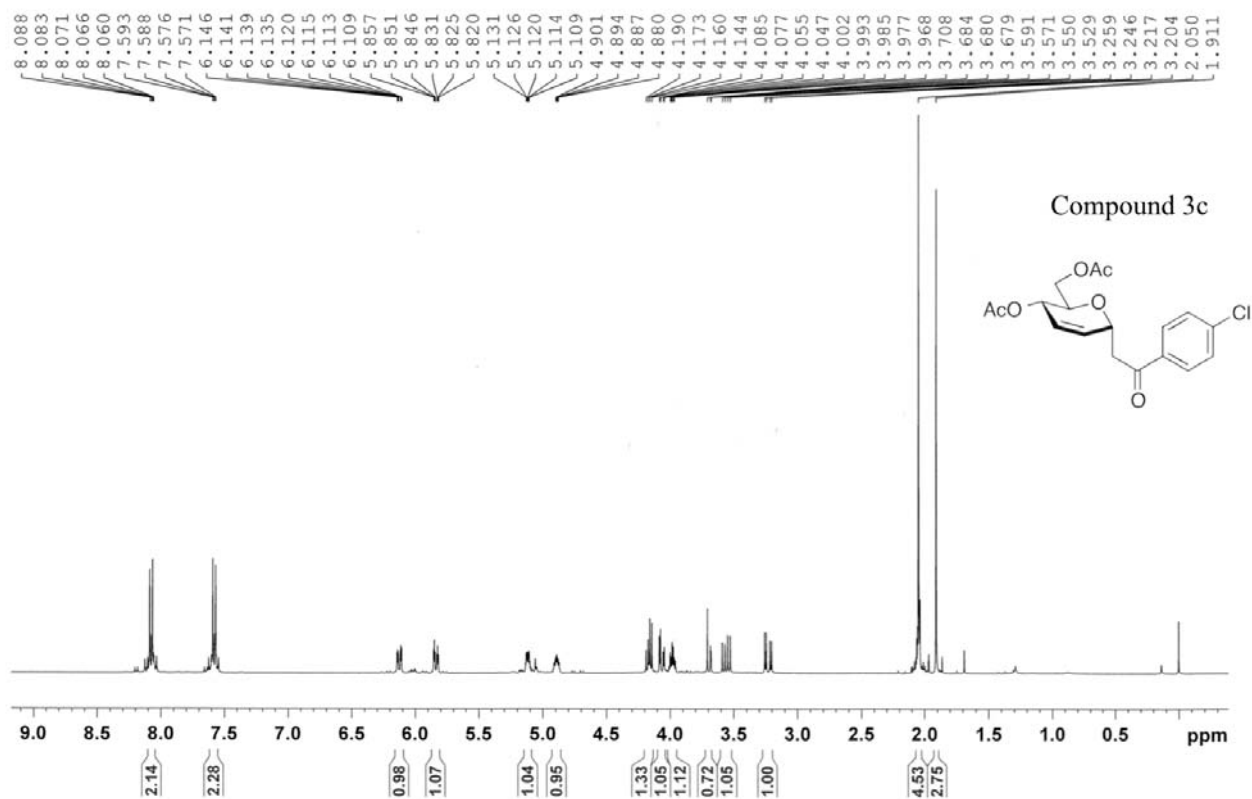

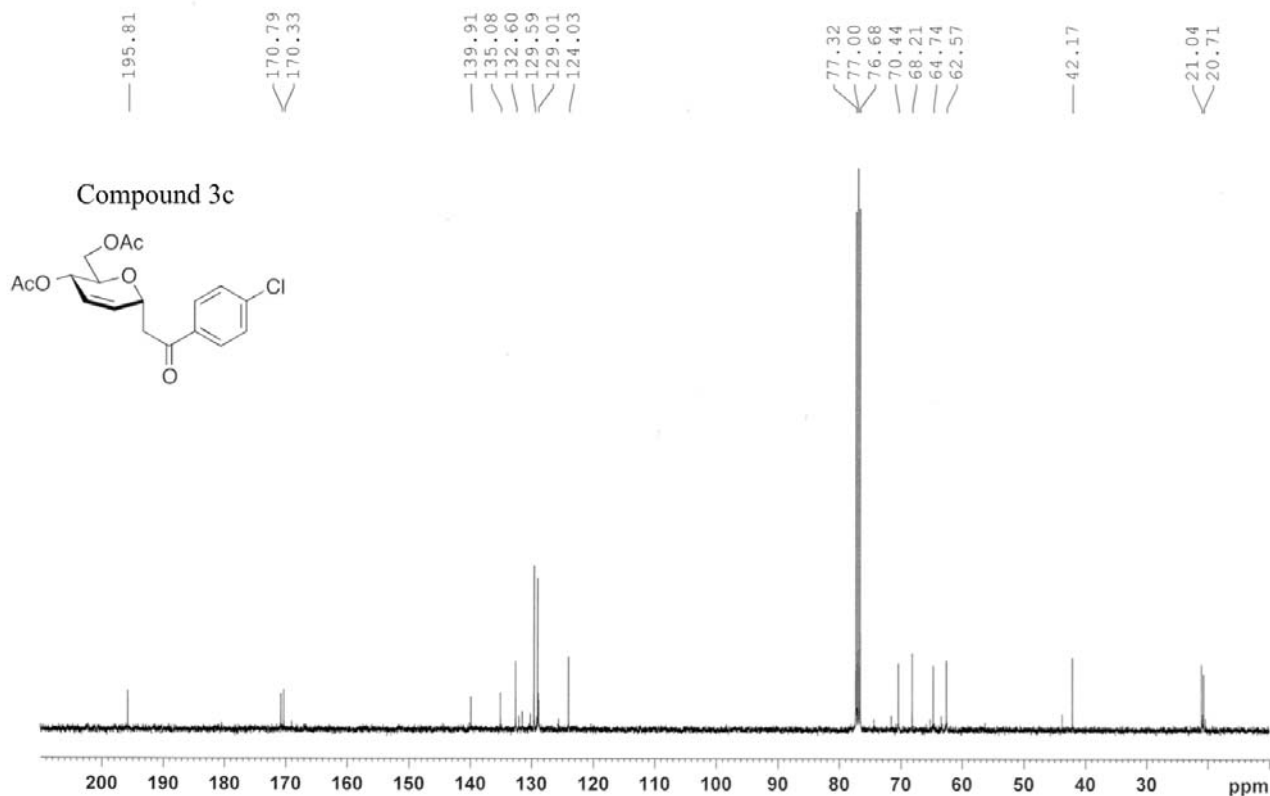

**1-((4,6-di-acetyl)-2,3-dideoxy- $\alpha$ -D-threo-hex-2-enopyranoxyl)-1-phenyl-ethanone (3d)**

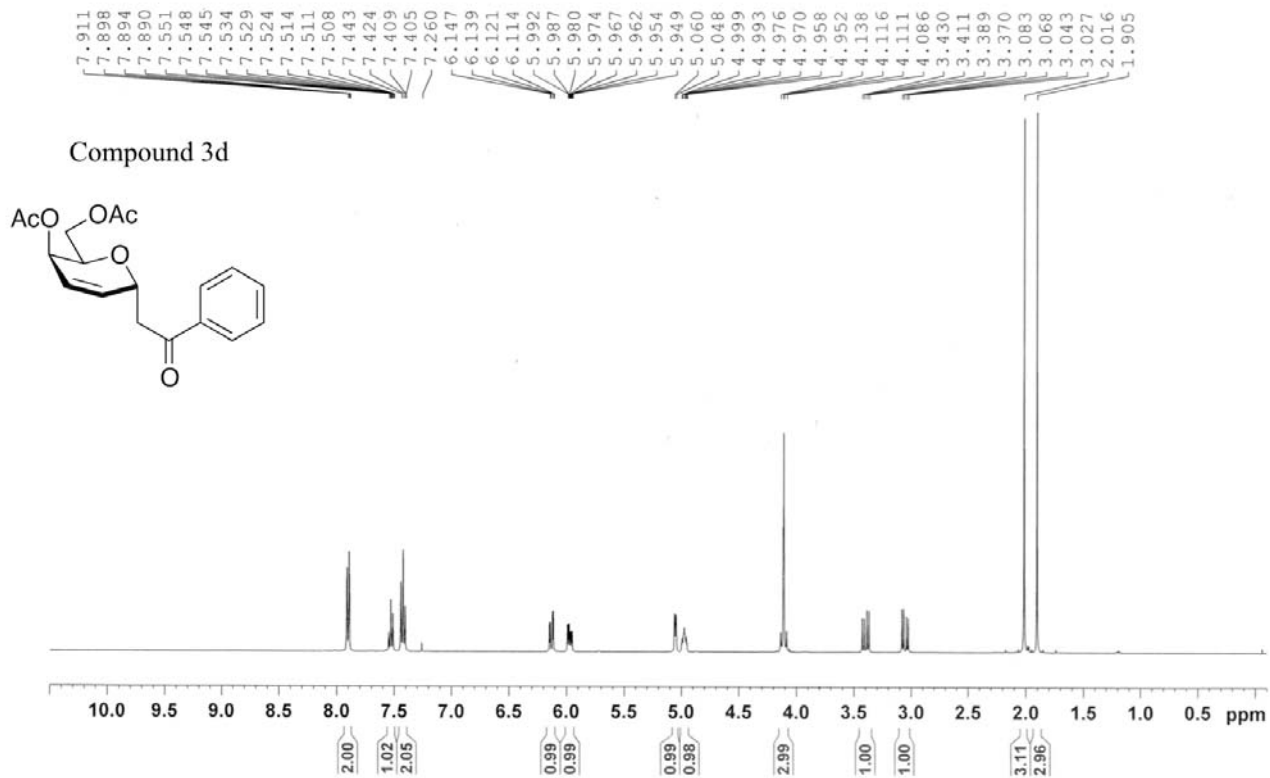

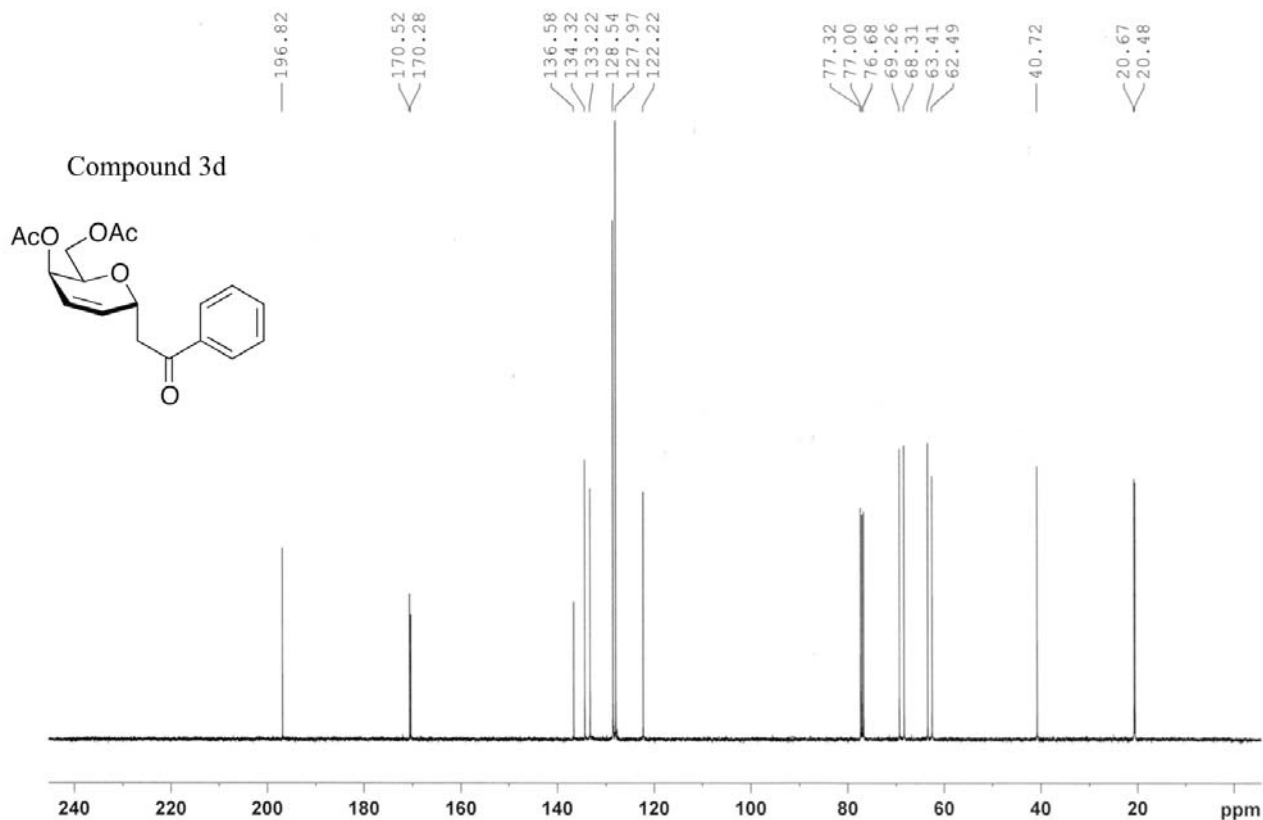

**1-((4,6-di-acetyl)-2,3-dideoxy- $\alpha$ -D-threo-hex-2-enopyranoxyl)-1-(4-methoxyphenyl)ethanone (3e)**

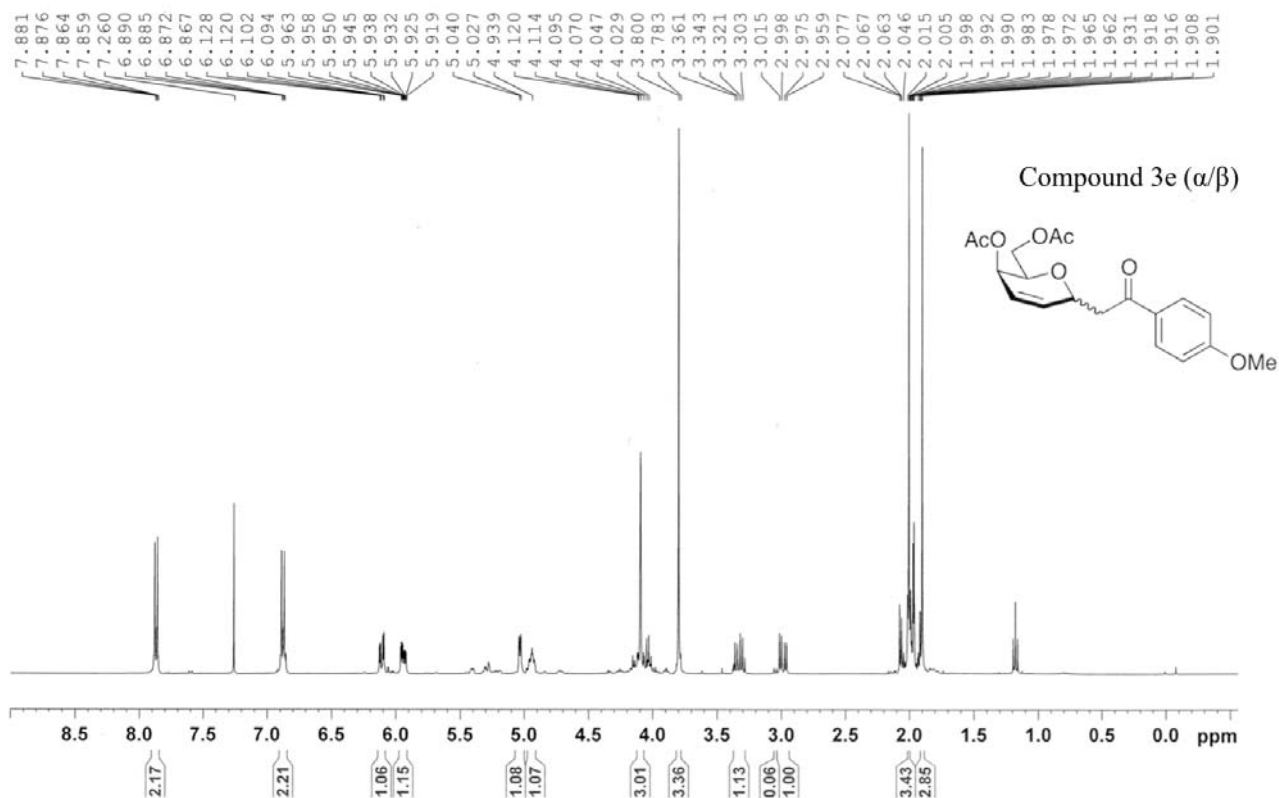

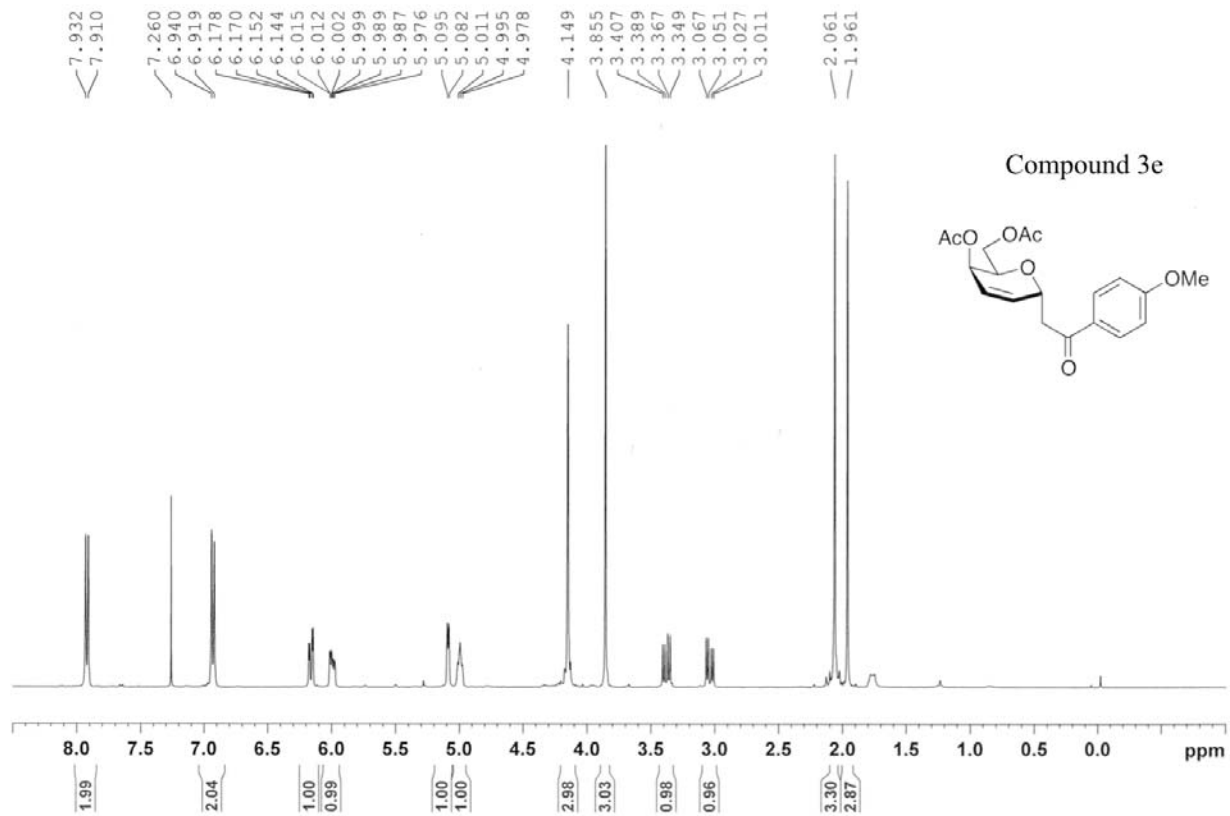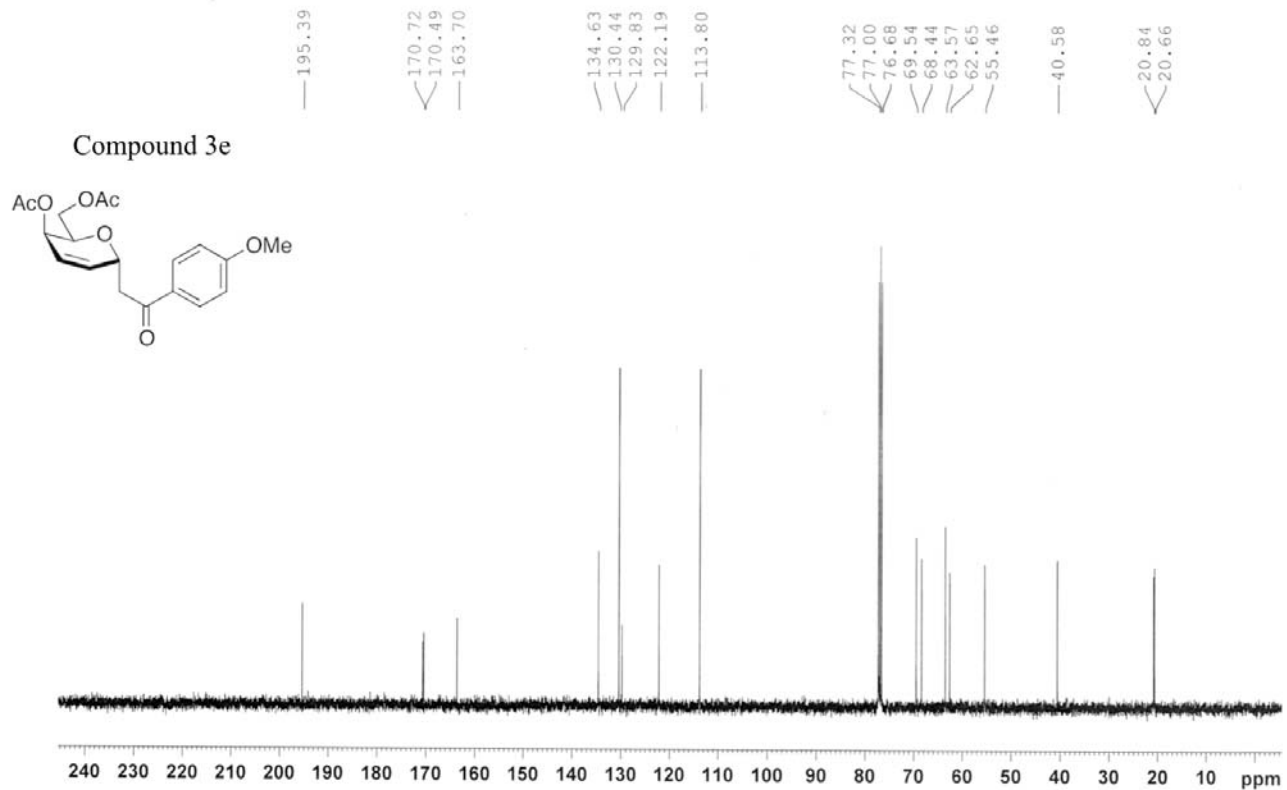



**1-((4,6-di-acetyl)-2,3-dideoxy- $\alpha$ -D-threo-hex-2-enopyranoxyl)-1-(4-chlorophenyl)ethanone (3f)**

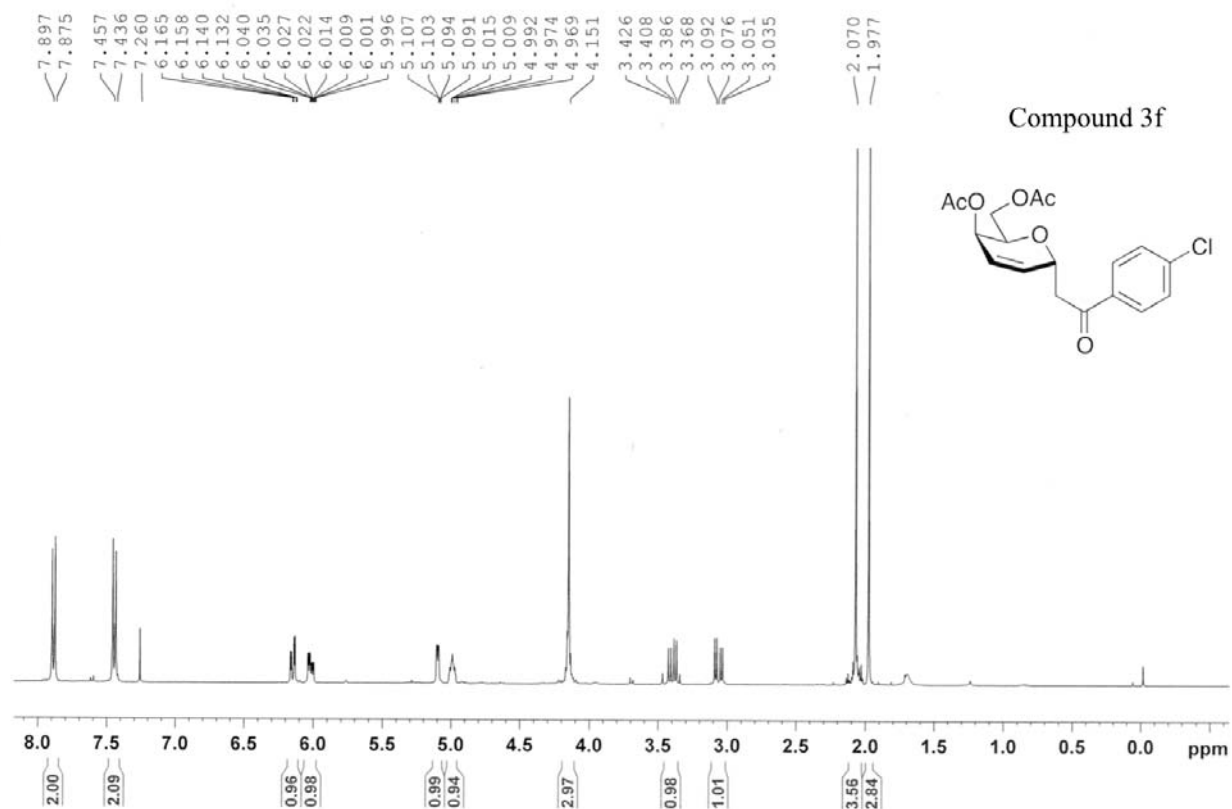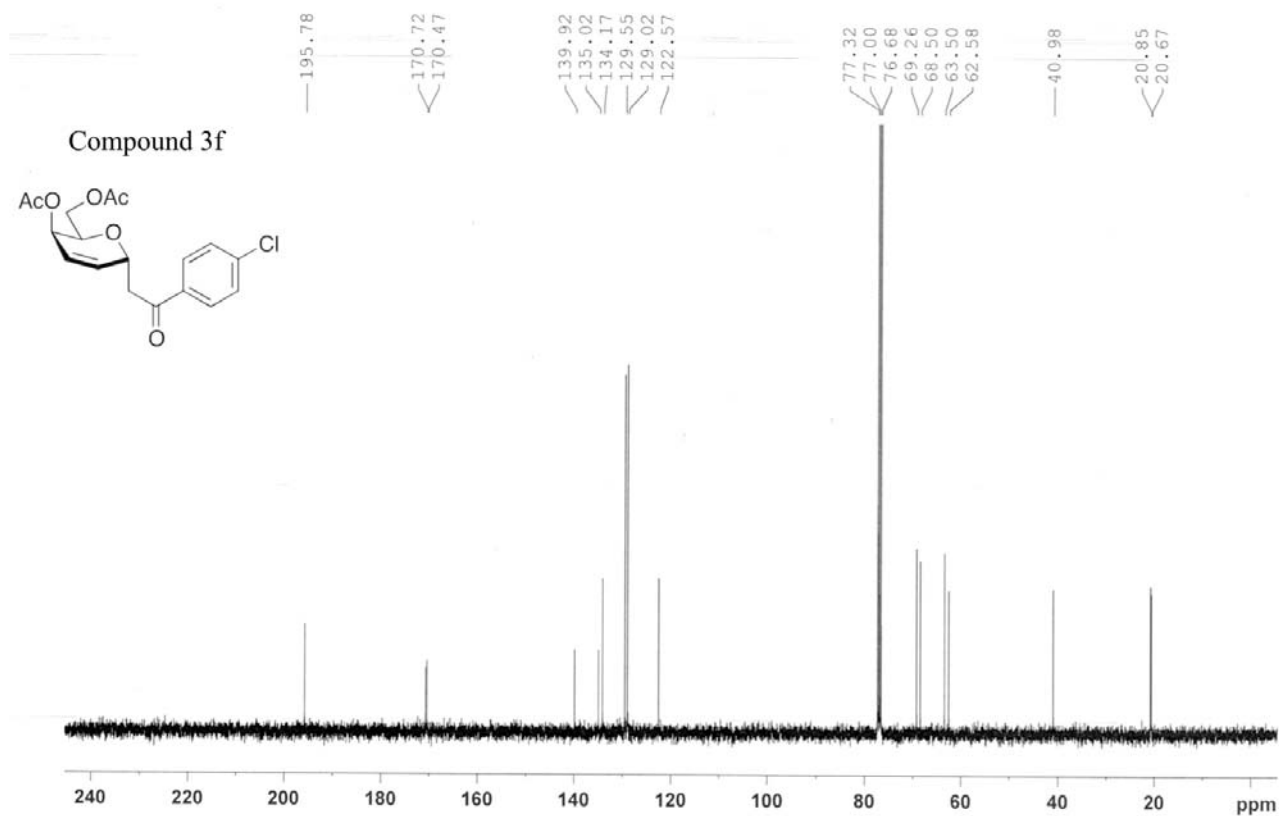

**1-((4,6-di-acetyl)-2,3-dideoxy- $\alpha$ -D-threo-hex-2-enopyranoxyl)-1-(4-fluorophenyl)ethanone (3g)**

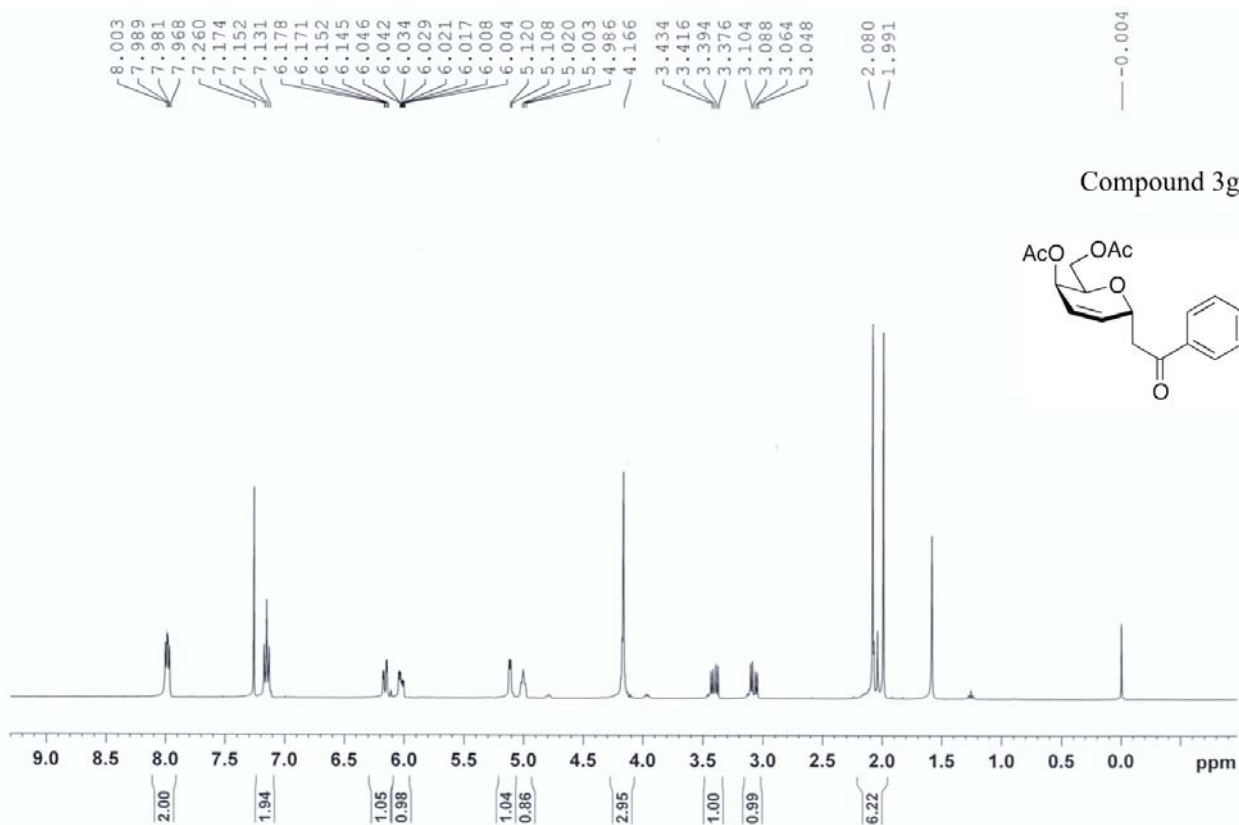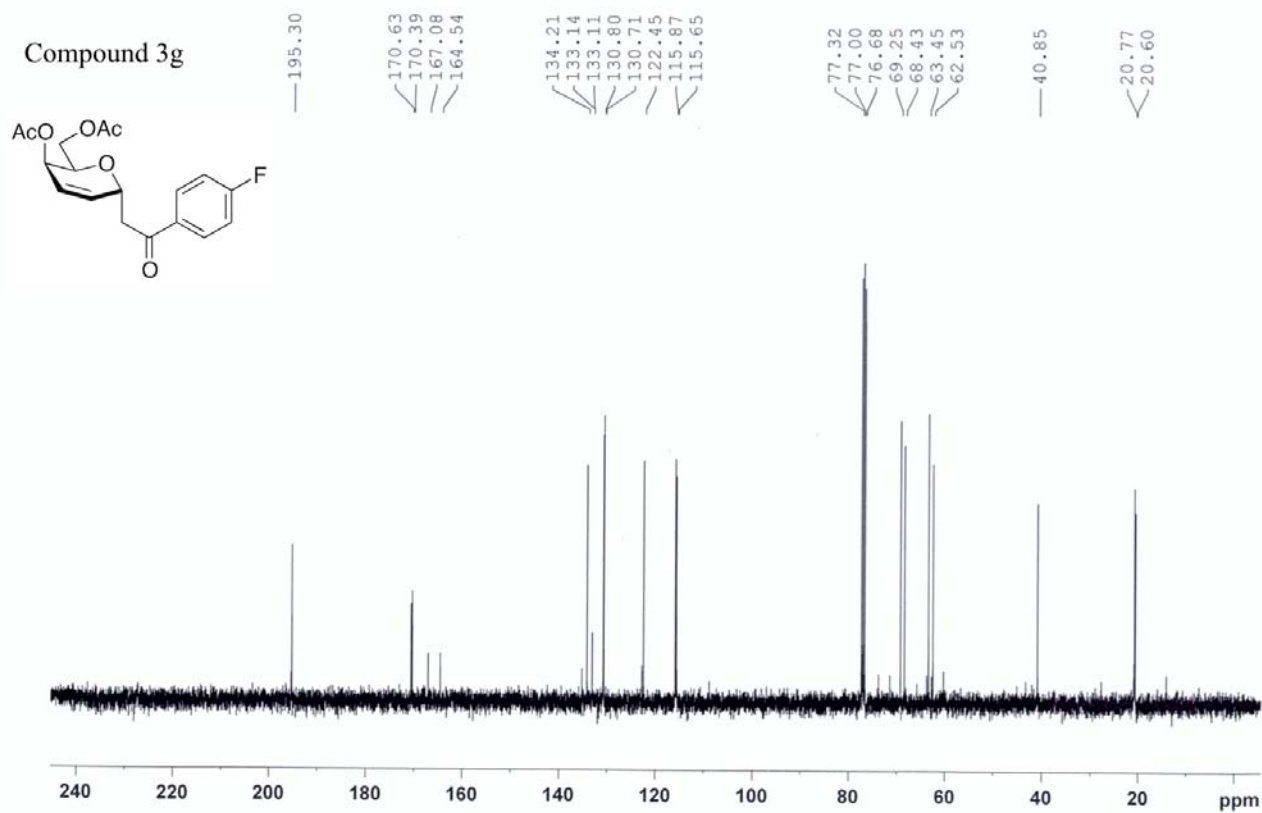

**1-((4,6-di-acetyl)-2,3-dideoxy- $\alpha$ -D-threo-hex-2-enopyranoxyl)-1-(3,4,5-trimethoxyphenyl)ethanone (3h)**

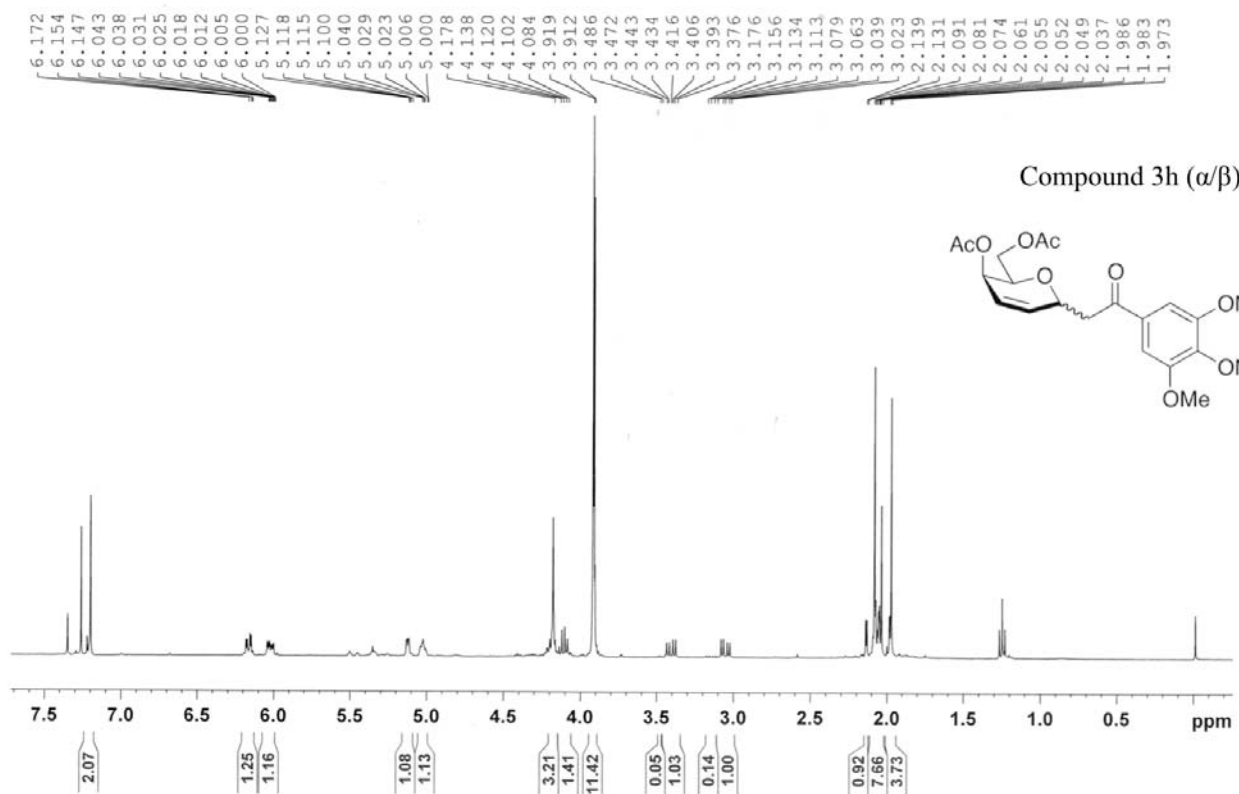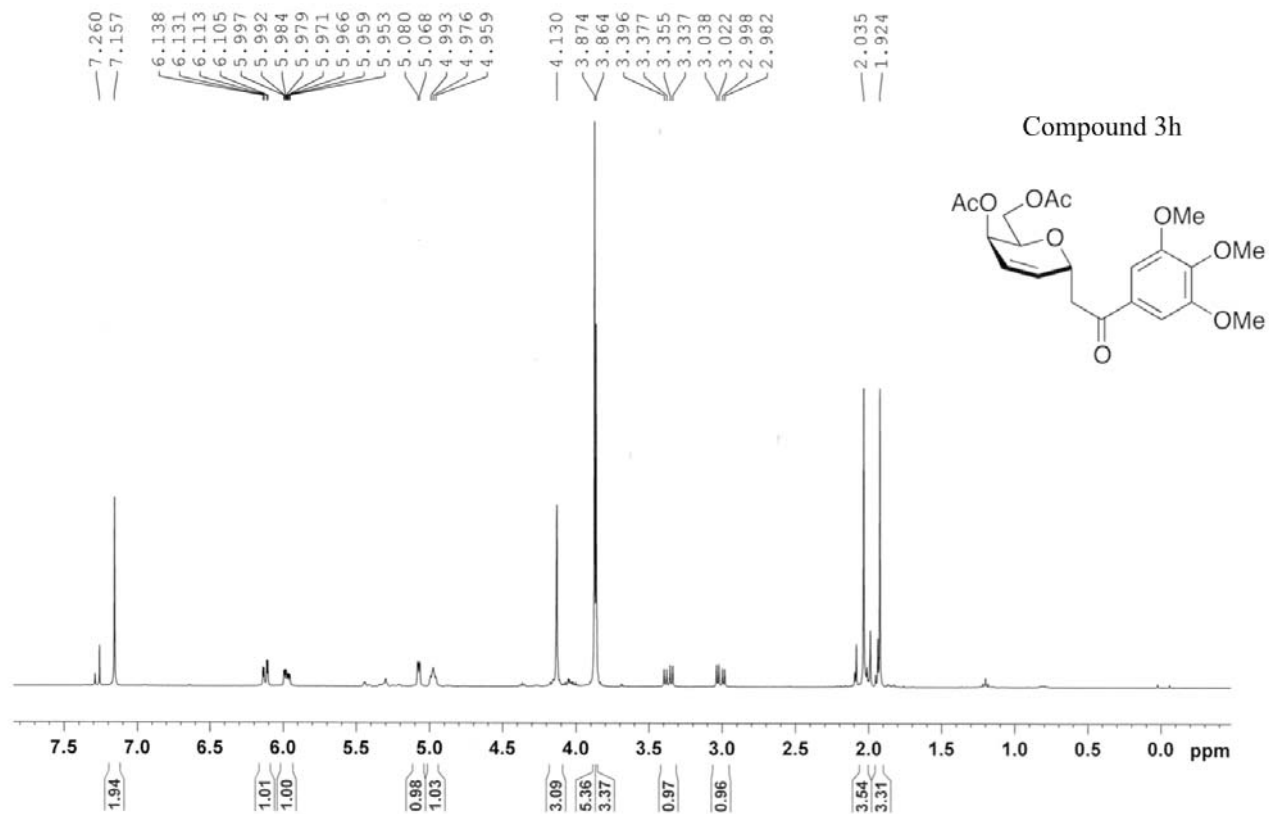

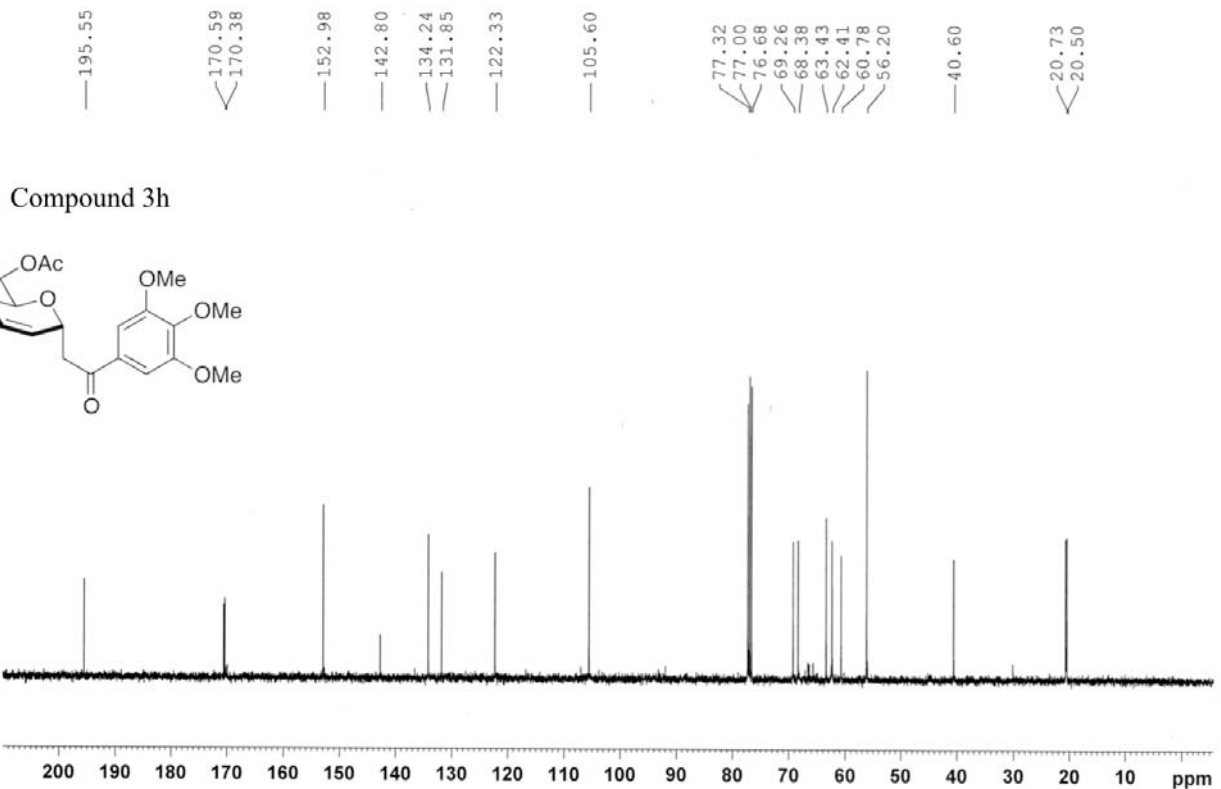

**1-((4,6-di-acetyl)-2,3-dideoxy- $\alpha$ -D-threo-hex-2-enopyranoxyl)-2-(3-methyl)butanone (3i)**

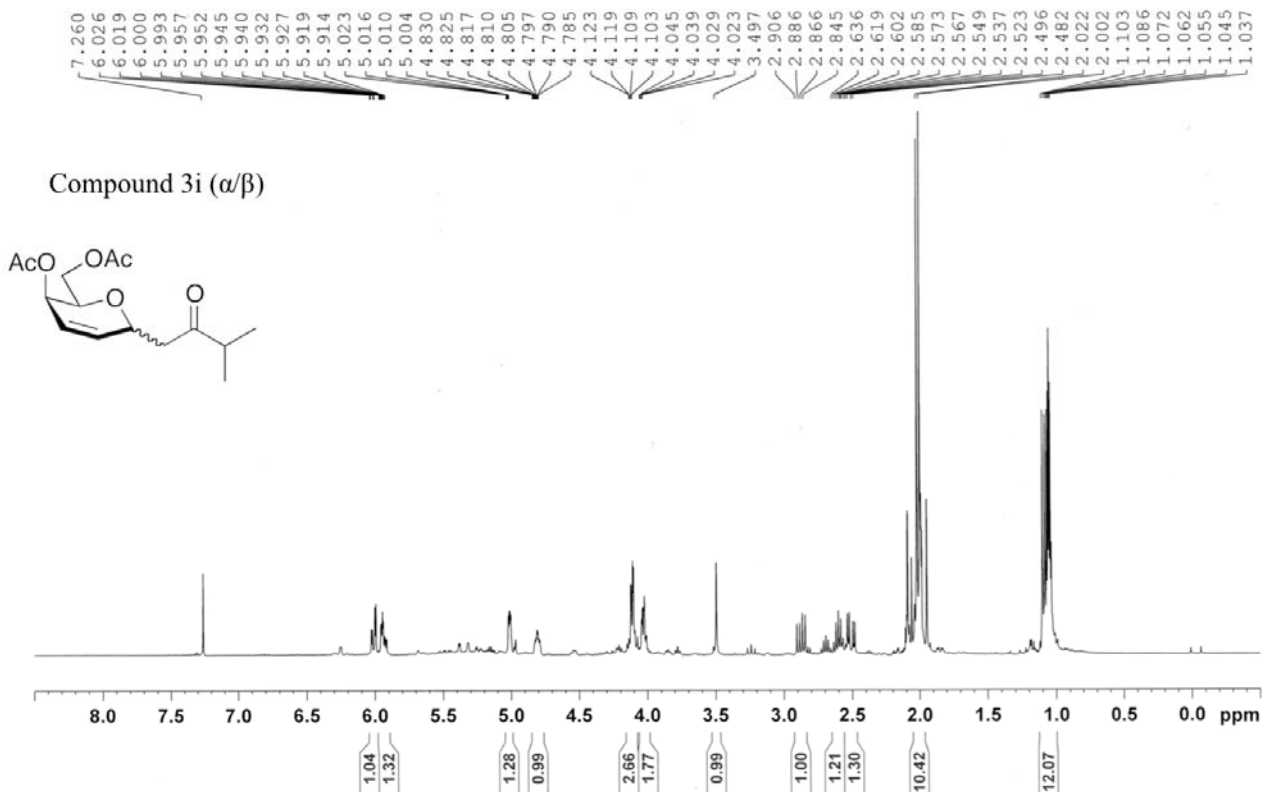

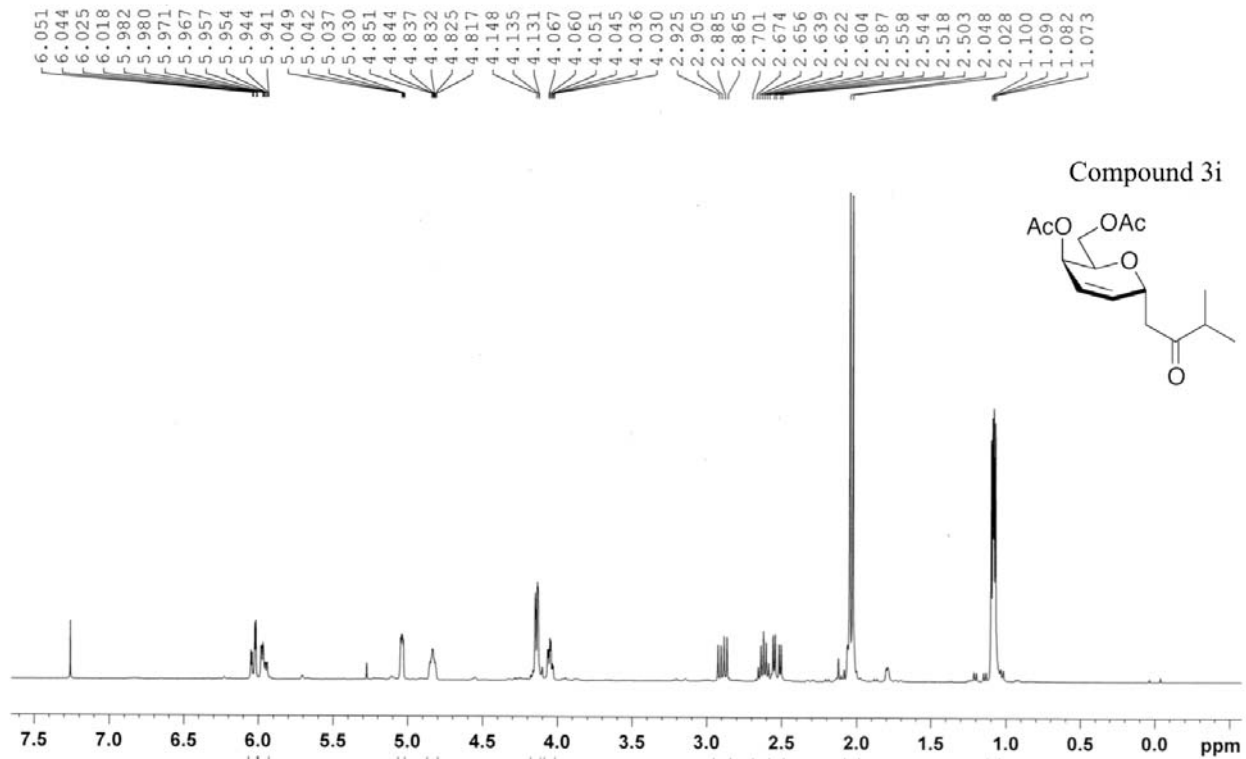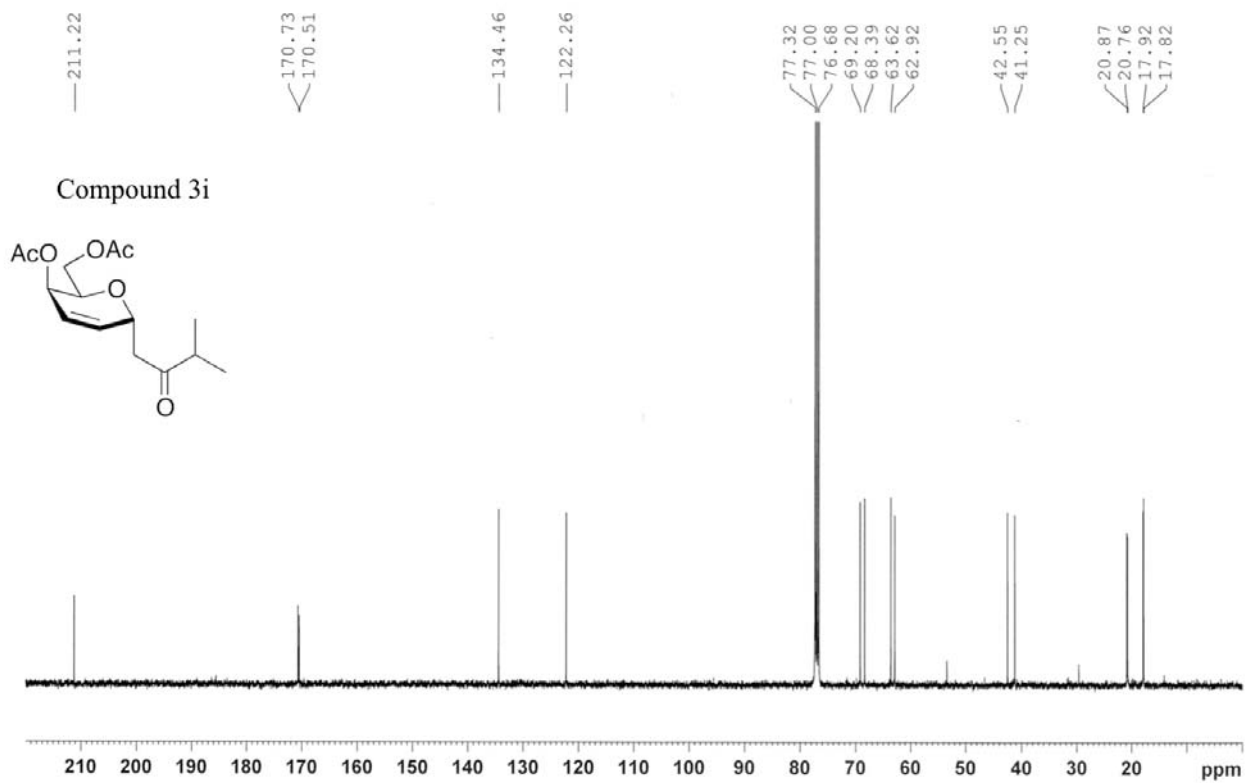

1-((4,6-di-acetyl)-2,3-dideoxy- $\alpha$ -D-threo-hex-2-enopyranoxyl)-2-pentanone (3j)

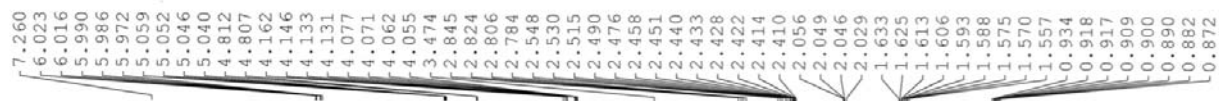

Compound 3j ( $\alpha/\beta$ )

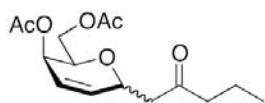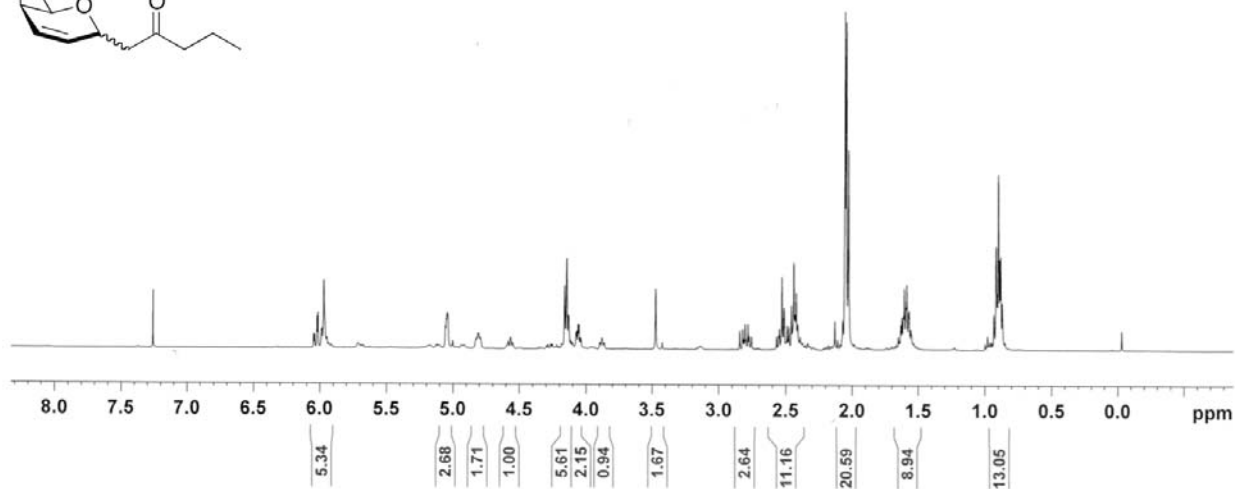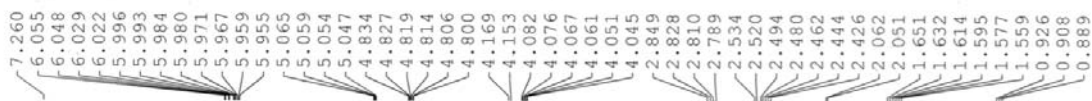

Compound 3j

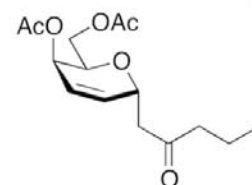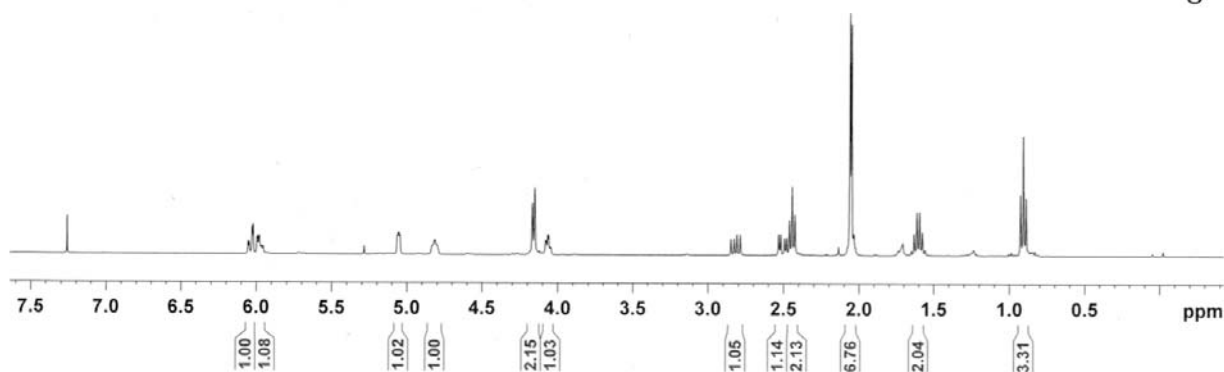

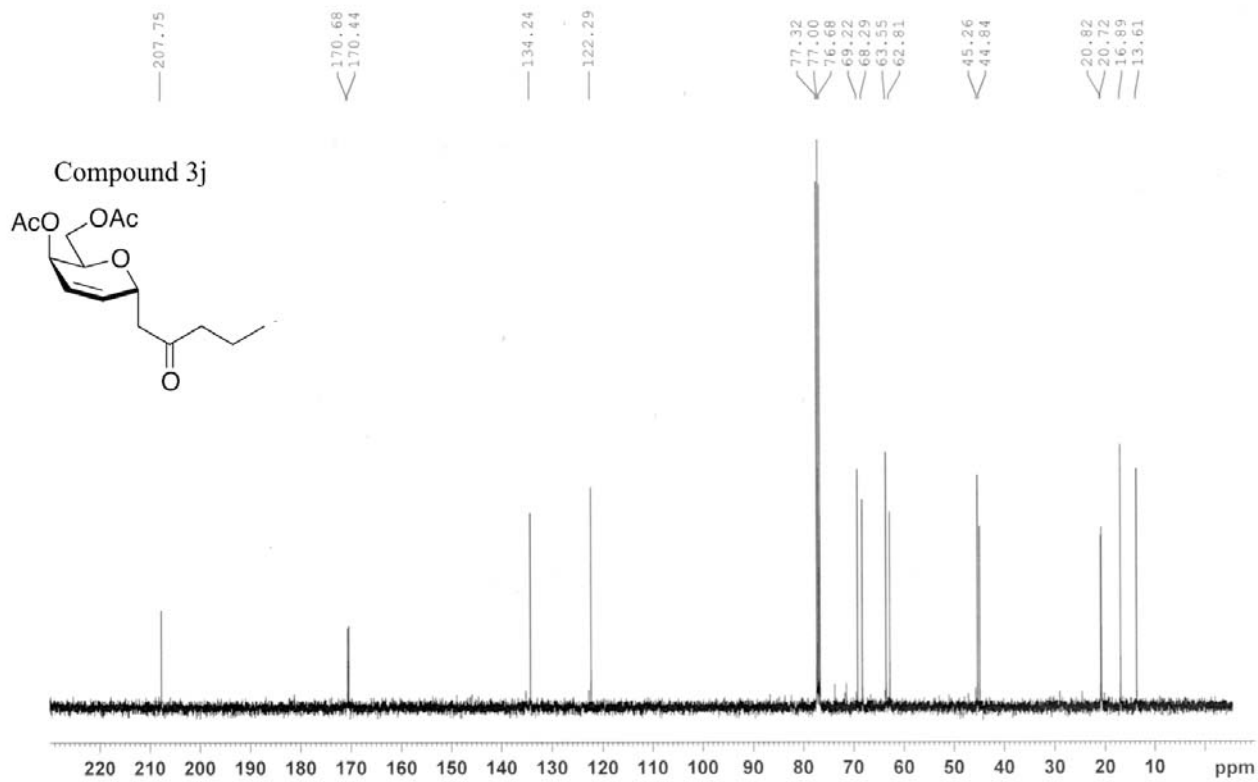

**COSY spectrum data for C-Glycoside 3d:****1-((4,6-di-acetyl)-2,3-dideoxy- $\alpha$ -D-threo-hex-2-enopyranoxyl)-1-phenyl-ethanone (3d)**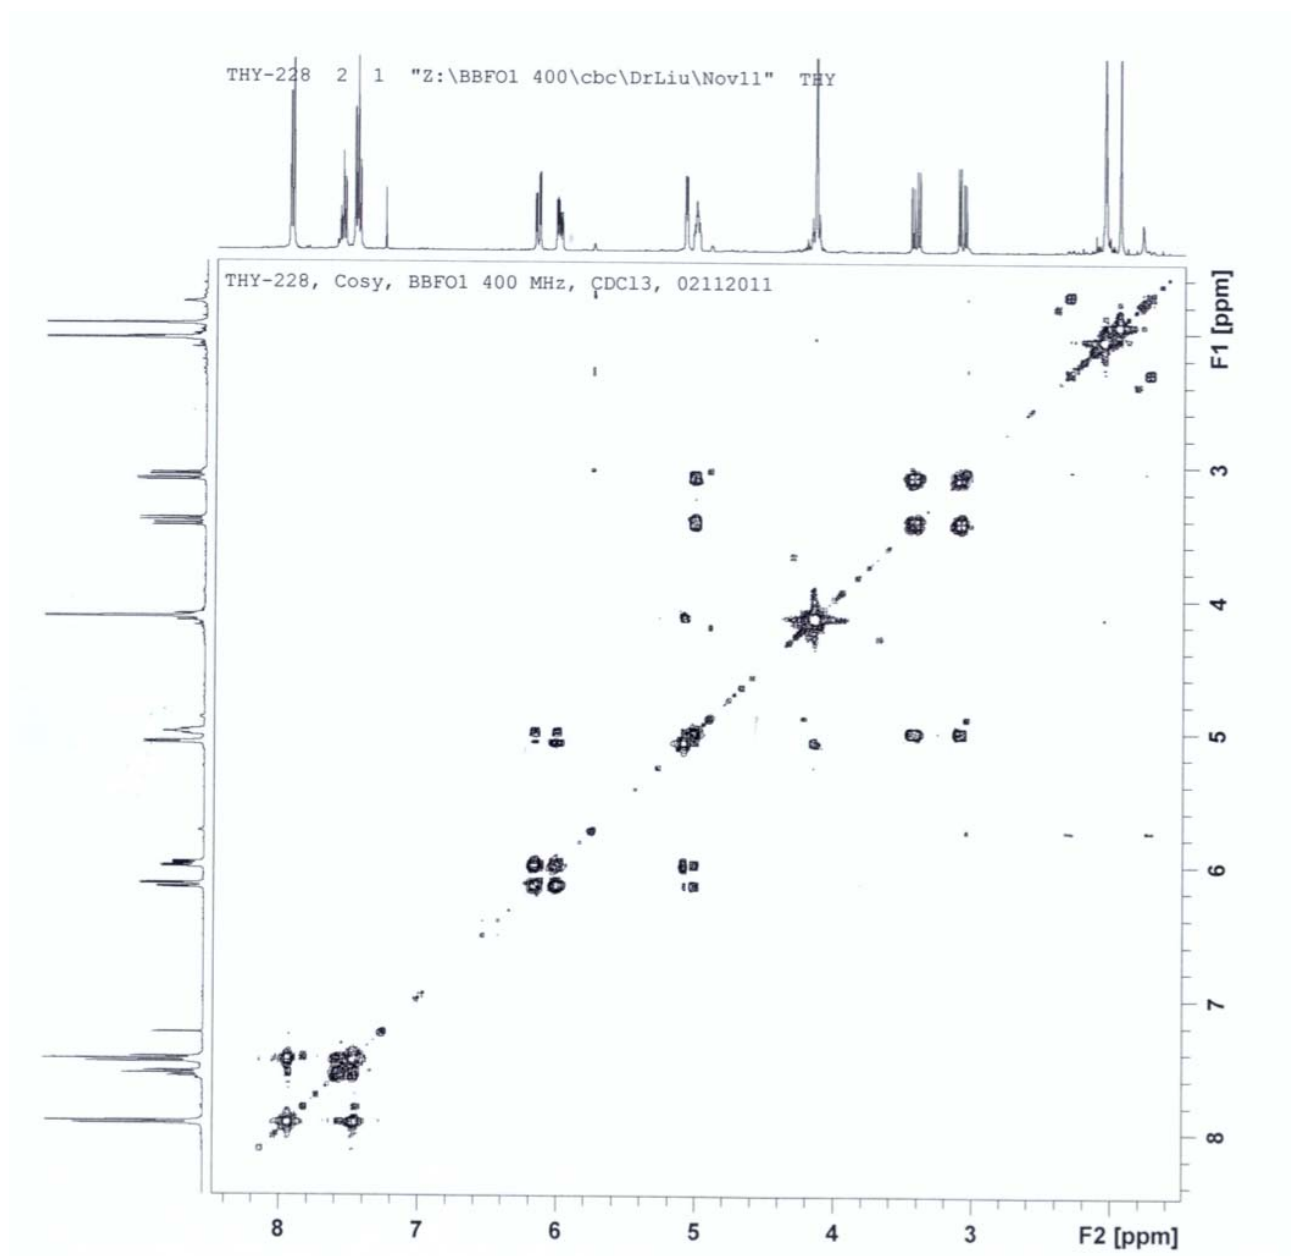



**NOESY spectrum data for C-Glycoside 3d:****1-((4,6-di-acetyl)-2,3-dideoxy- $\alpha$ -D-threo-hex-2-enopyranoxyl)-1-phenyl-ethanone  
(3d)**

### Spectra Data for C-Glycosides (4b-4e):

#### 1-((4,6-di-acetyl)-2,3-dideoxy- $\beta$ -D-erythro-hex-2-enopyranoxyl)-2-(3-methyl)butanone (4b)

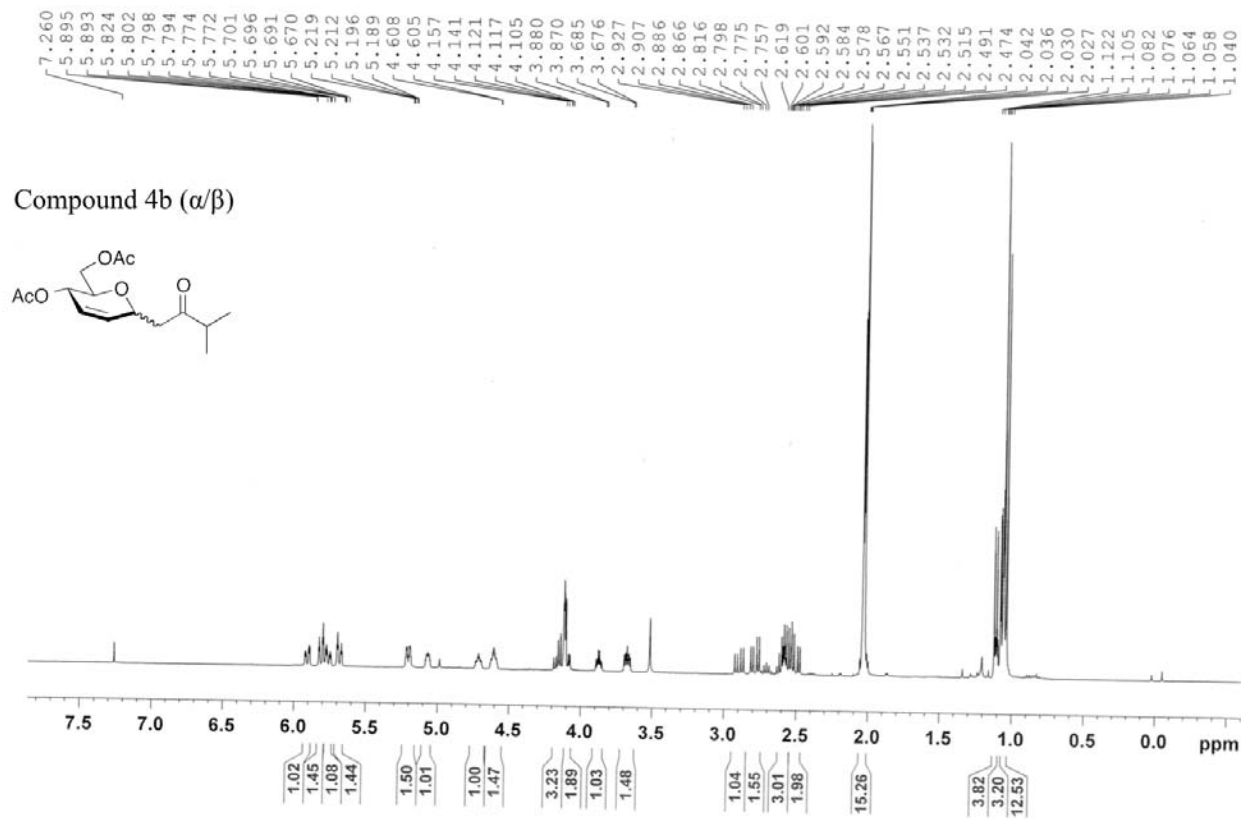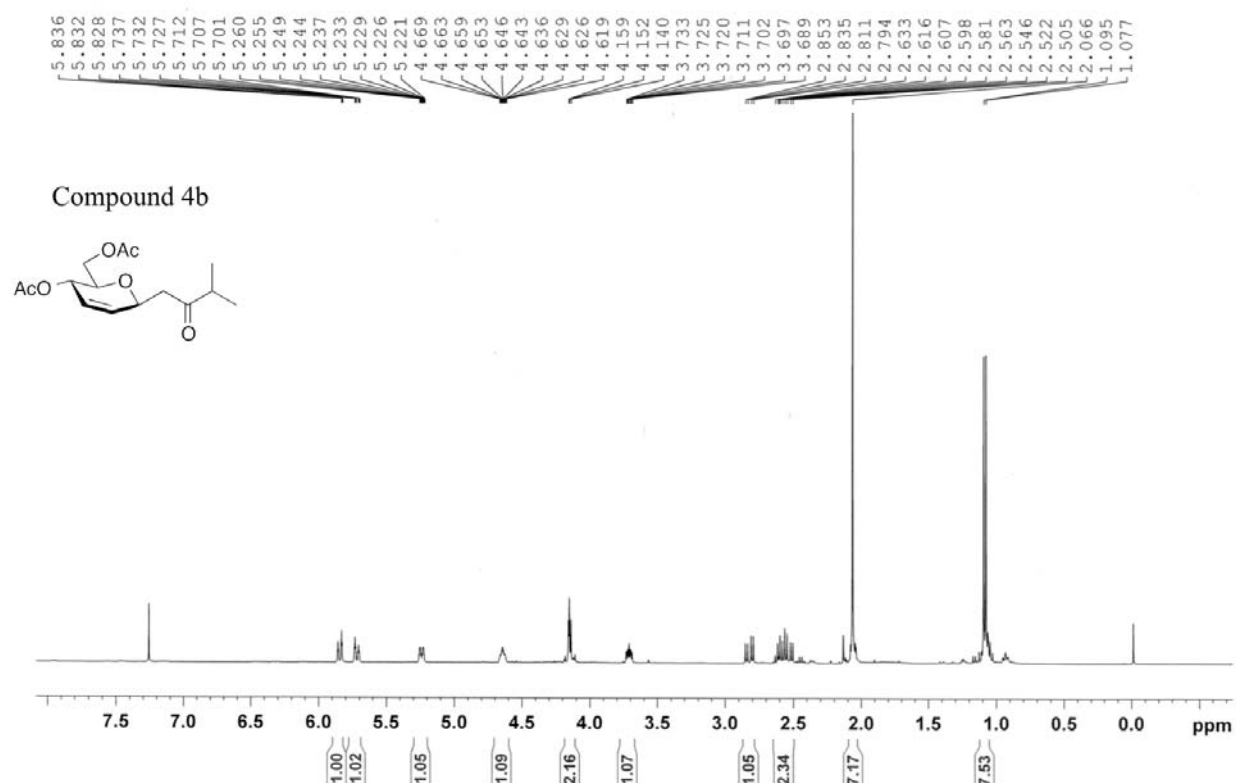

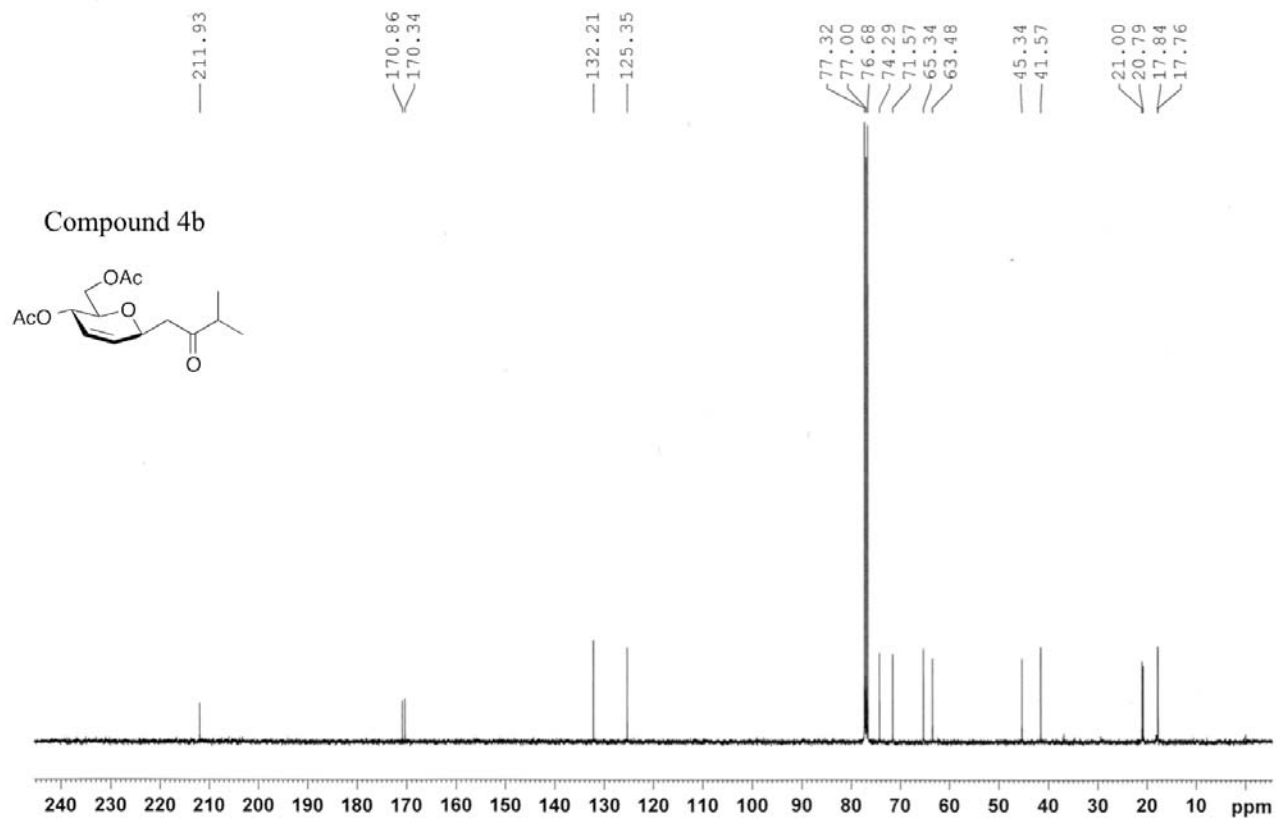

1-((4,6-di-acetyl)-2,3-dideoxy- $\beta$ -D-erythro-hex-2-enopyranoxyl)-2-pentanone (4c)

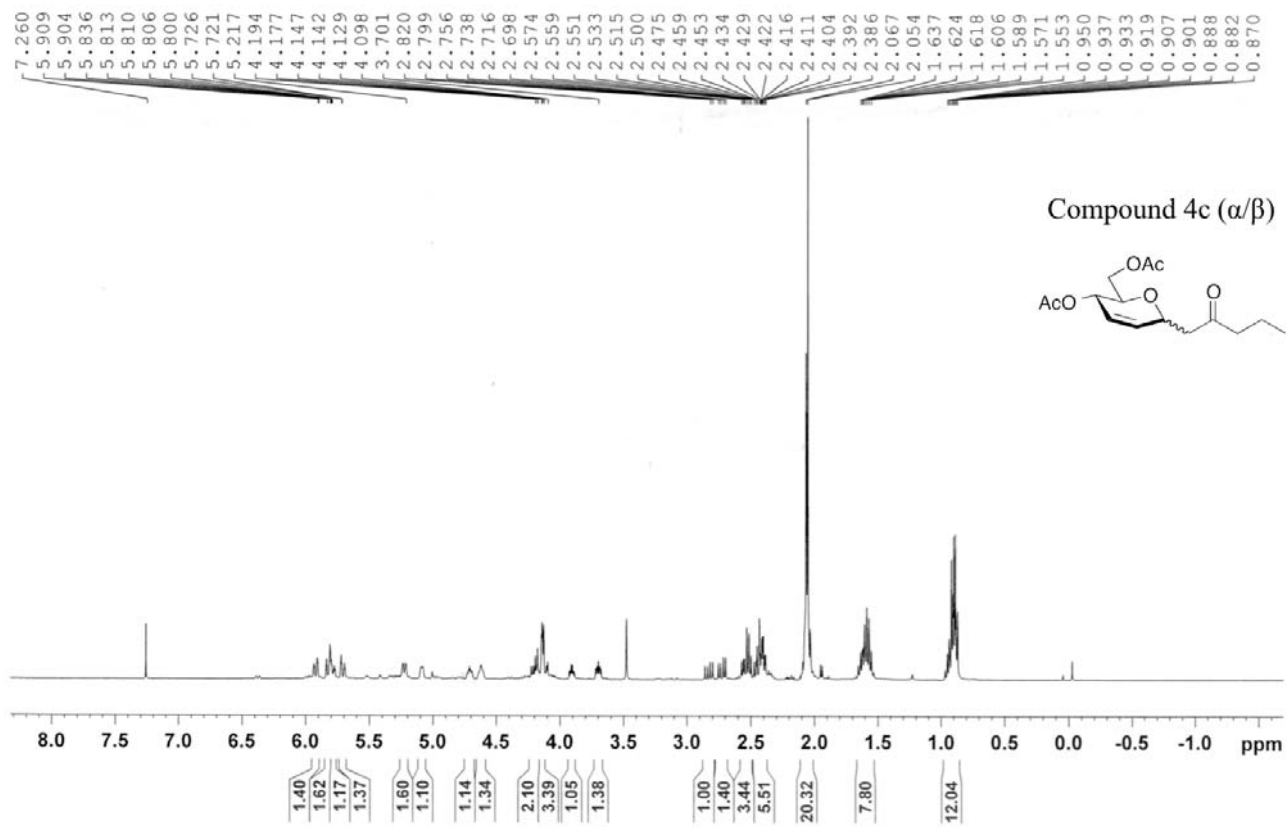

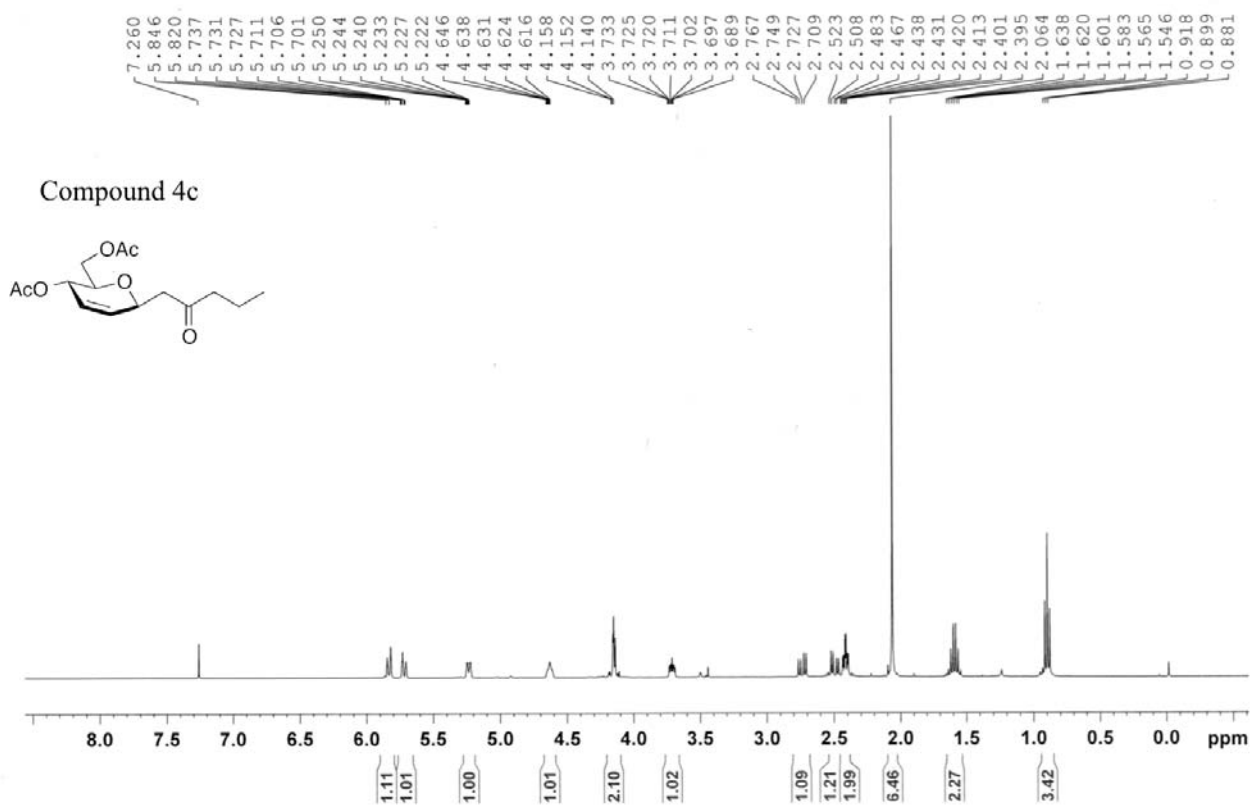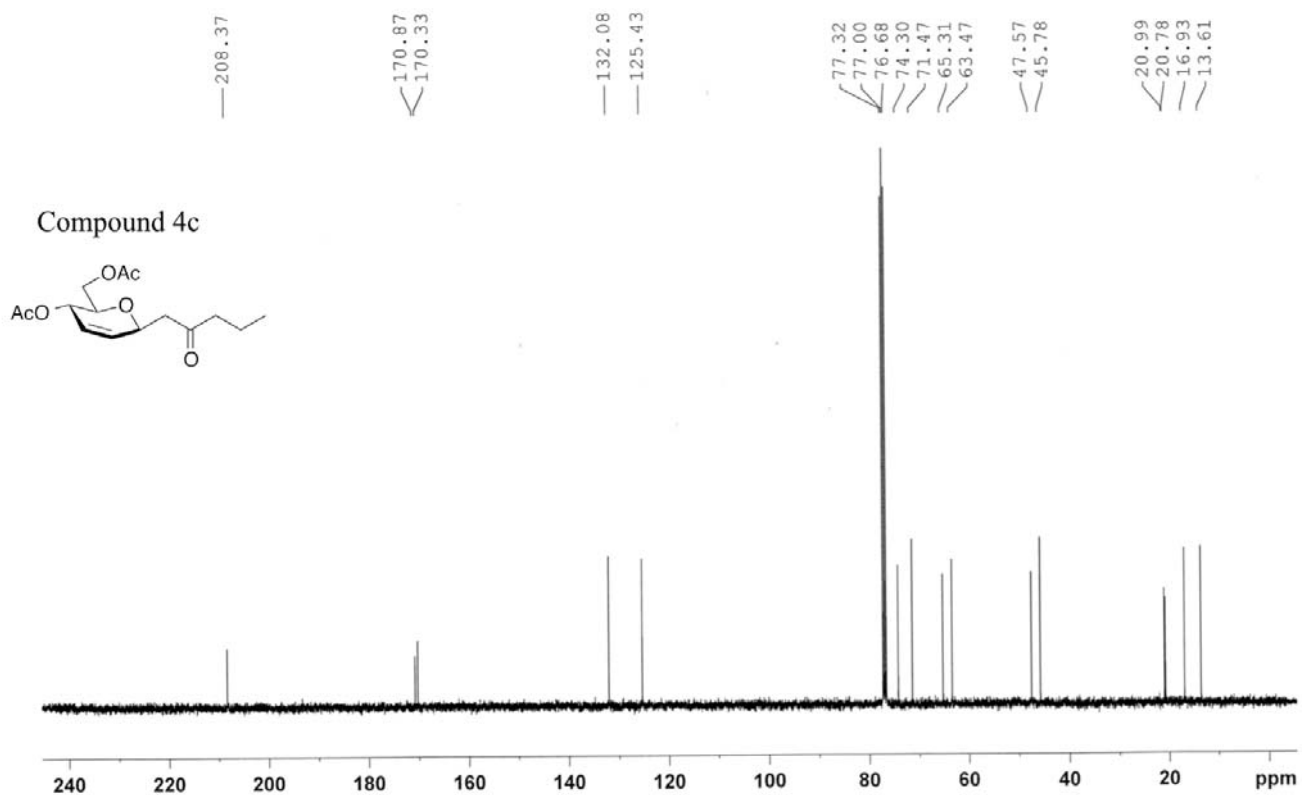

1-((4,6-di-acetyl)-2,3-dideoxy- $\beta$ -D-erythro-hex-2-enopyranoxyl)-2-butanone (4d)

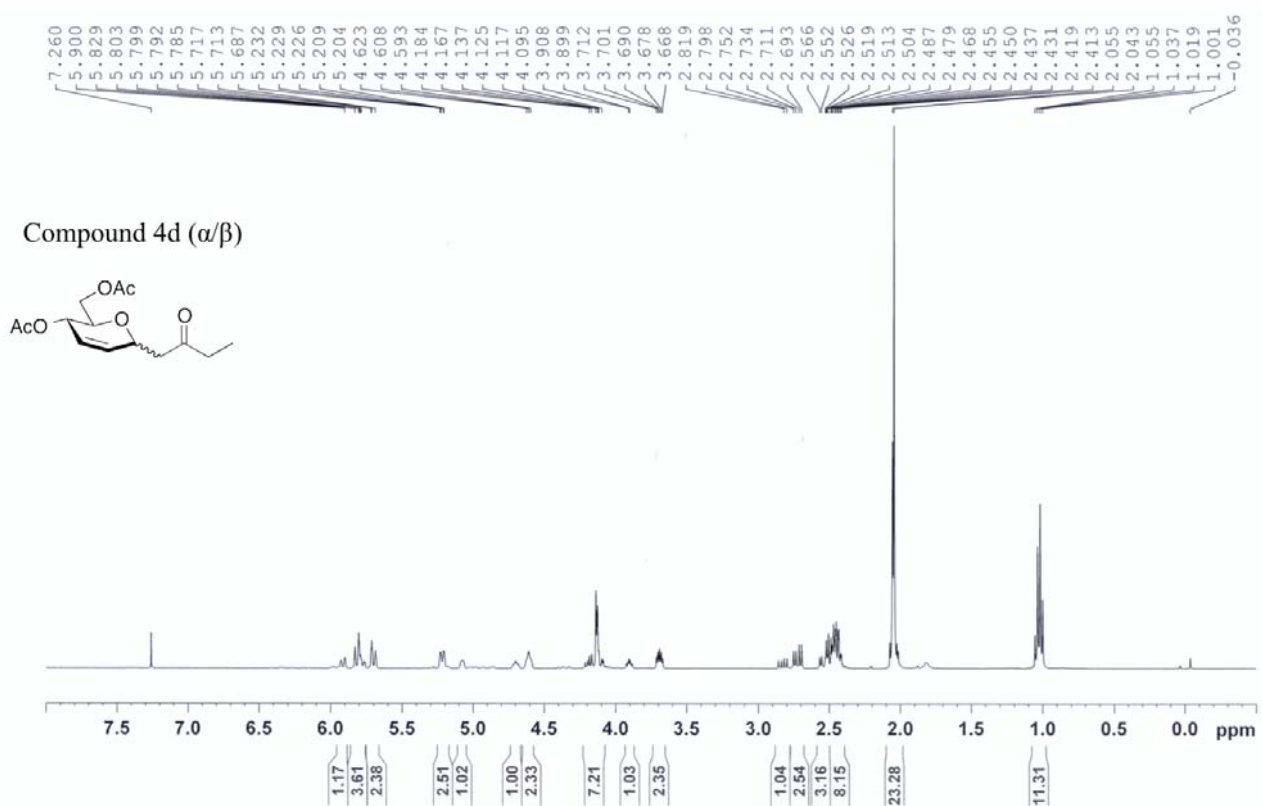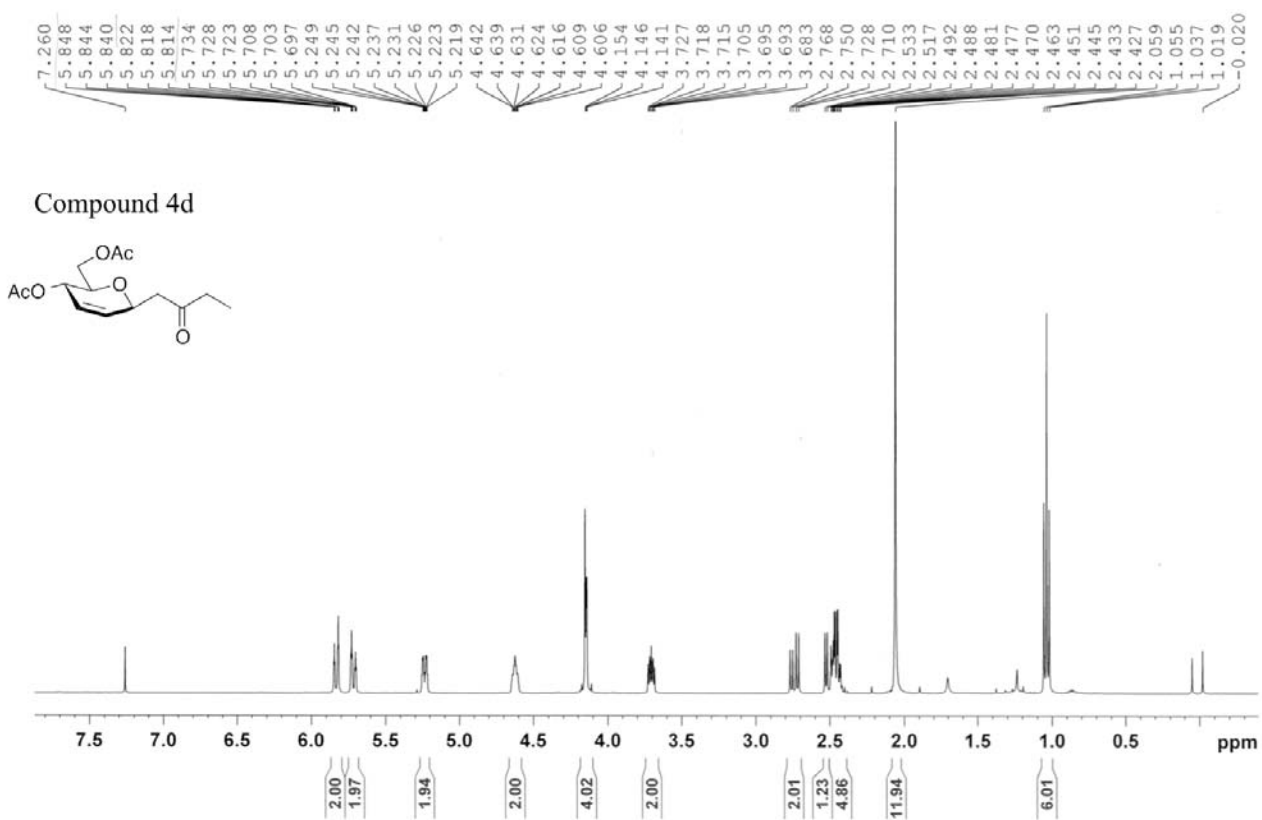

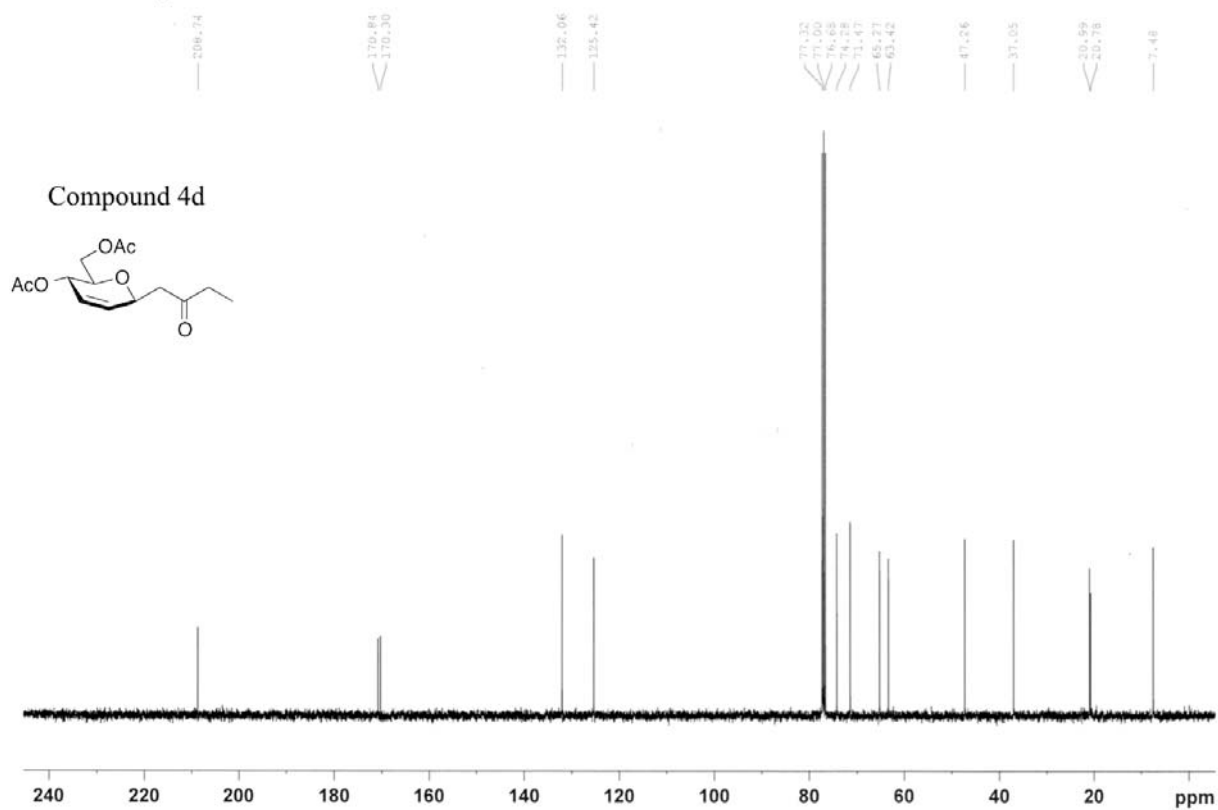

(2R-*cis*)-1-(5-acetoxy-5,6-dihydro-2H-pyran-2-yl)acetophenone (4e)

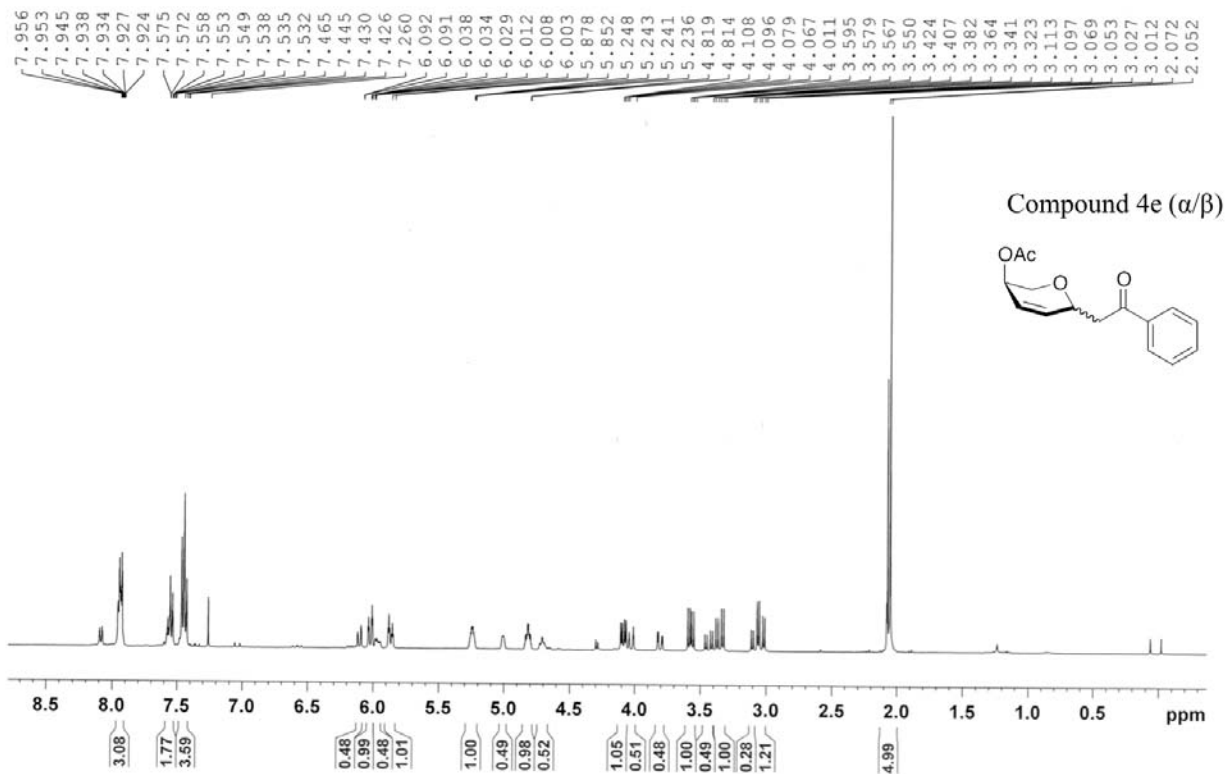

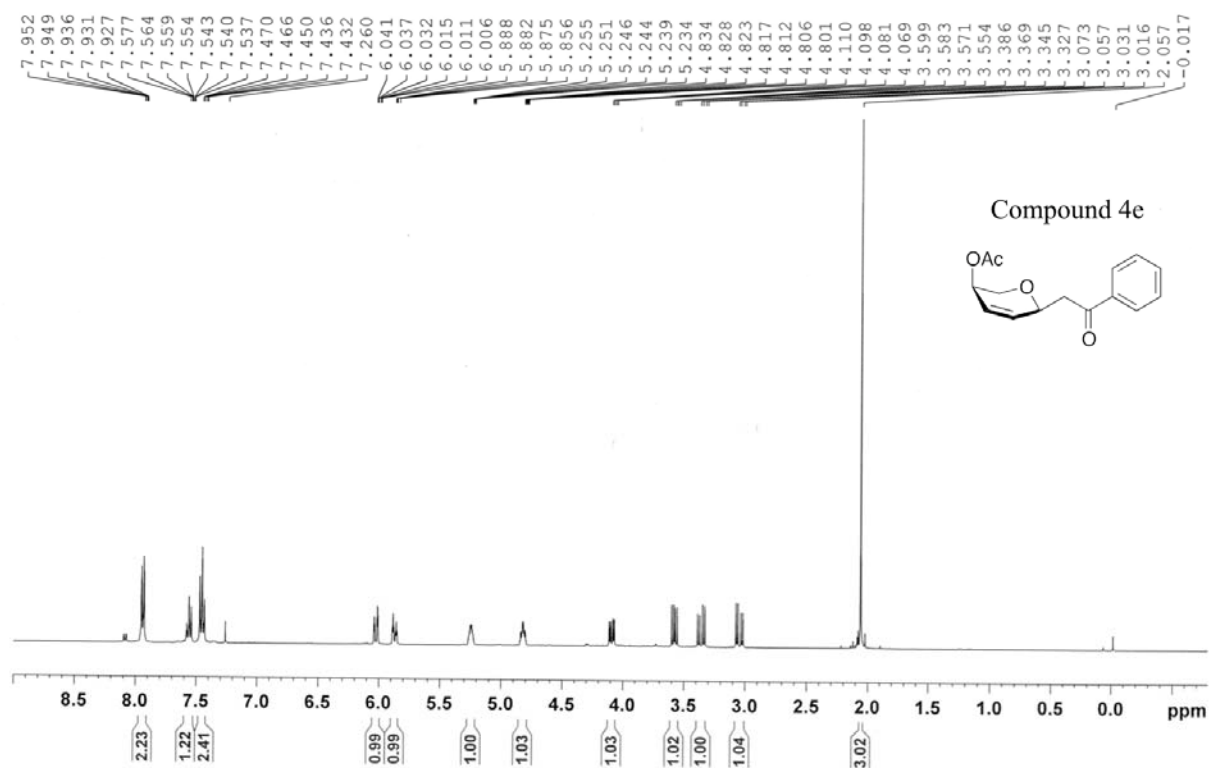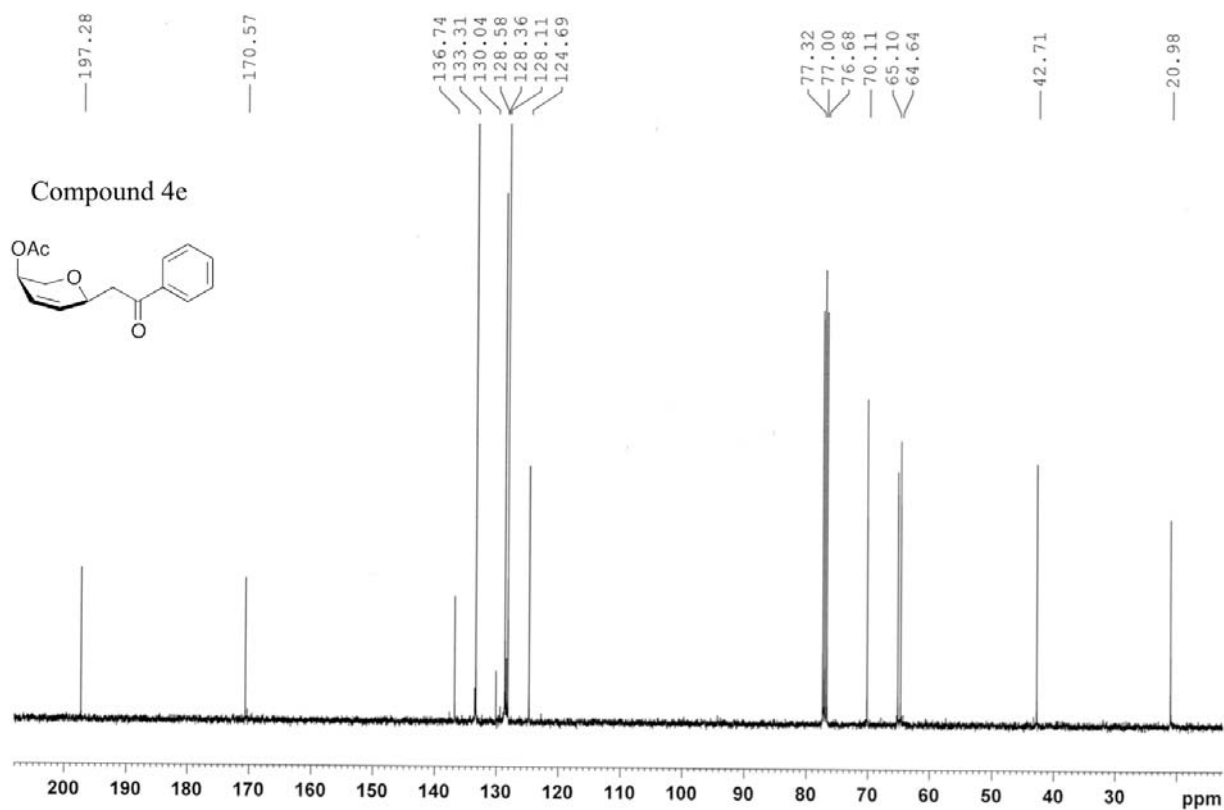

Supplement: c4ra07429g1.pdf [file c4ra07429g1.pdf]
